# Supplementary material for: Using signals associated with safety in avoidance learning: computational model of sex differences
Source: PeerJ. 2015 Jul 14;3:e1081. doi: 10.7717/peerj.1081 (PMC4512772; doi:10.7717/peerj.1081)
Supplement: Supplemental Information 5 — Each tab of the file contains values used to construct an individual figure indicated by the name of the tab. [file peerj-03-1081-s005.xlsx]

## Sheet: Fig 4C
Female present
Avg latency (sess of 20 trials)	1	2	3	4	5	6	7	8	9	10	11	12		1	2	3	4	5	6	7	8	9	10	11	12
sim 1	49.4	38.85	12.35	5.3	0.5	0.2	0.6	1	0.55	0.65	0.6	1.45		0.95	0.95	3.55	5.15	8.4	18	23	26.1	25.55	31.45	36.1	21.35
sim 2	43.3	16.4	1.75	1.85	0.9	0.75	0.5	1.1	1.7	1.35	1	1.3		3	1.6	3.4	8.55	20.8	12.35	37.55	23.85	27.35	22.45	23.1	27.1
sim 3	47.2	52.45	42.35	21.25	2.3	0.5	1	0.95	0.55	0.55	0.75	0.35		3.35	10	3.1	14.35	22.4	22.25	12.95	27.6	11.35	29.8	41.4	40.95
sim 4	51.75	23.2	2.25	1.5	0.7	1.15	0.4	1.45	0.75	1.5	1.8	2.35		4	3.95	6.9	13.95	7.55	11.55	26.55	30.55	22.7	42.65	22.95	37.1
sim 5	54	39.4	9.85	1.35	1.25	0.65	0.9	0.7	0.85	0.9	0.95	1.25		2.1	1.9	6.25	2.95	18.35	17.15	18.05	23.35	26.85	29.45	30.85	37.3
sim 6	49.85	49.3	35.65	10.65	0.9	0.5	0.45	0.35	0.7	0.2	1.4	1.5		2.2	1.45	6.55	4.85	6.15	17.65	10.05	18.25	30.4	37.75	18	35.55
sim 7	46.8	33.15	4.75	0.95	1.15	0.85	0.4	1.1	1.15	1.15	1.25	1.5		1.15	3	5.35	12.2	17.3	22.9	10.05	23.85	30.15	36.25	29.9	28.45
sim 8	49.75	54	41.55	33.4	3.65	1.45	0.35	0.7	0.1	0.65	1	0.9		1.45	0.85	4.9	6.6	2.85	6	16.6	23.75	17.45	18.3	35.65	37.35
sim 9	54	51.55	43.65	6.4	1.3	0.55	0.55	0.8	0.55	1.55	1.55	1.9		3.55	5.25	17.1	4.4	8.45	9.7	20.15	28.85	24.2	28.25	38.2	35.6
sim 10	46.55	38.65	14.7	1.65	0.65	1.05	0.5	0.45	0.8	0.35	2.05	1.45		2.7	3.05	4.95	9.25	17.3	20.9	25.9	22.25	21.75	27.15	24.25	31.55
n	10	10	10	10	10	10	10	10	10	10	10	10		10	10	10	10	10	10	10	10	10	10	10	10
mean	49.26	39.695	20.885	8.43	1.33	0.765	0.565	0.86	0.77	0.885	1.235	1.395		2.445	3.2	6.205	8.225	12.955	15.845	20.085	24.84	23.775	30.35	30.04	33.23
sd	3.41409	12.7349	17.7346	10.8016	0.959224	0.36897	0.217371	0.328971	0.42374	0.481346	0.46431	0.533568		1.04946	2.76817	4.05342	4.12568	6.96254	5.68919	8.54878	3.54955	5.86649	7.19139	7.75617	5.99533
serr	1.07963	4.02712	5.60819	3.41576	0.303333	0.116679	0.0687386	0.10403	0.133998	0.152215	0.146828	0.168729		0.331868	0.875373	1.28181	1.30466	2.20175	1.79908	2.70336	1.12247	1.85515	2.27412	2.45272	1.89589
Female absent
Avg latency (sess of 20 trials)	1	2	3	4	5	6	7	8	9	10	11	12		1	2	3	4	5	6	7	8	9	10	11	12
sim 1	44.45	18.35	12.6	0.75	0.55	1.05	1.15	0.4	1.1	2.3	2.7	1.4		1.85	1.95	4.75	6.1	3.85	2.1	13.25	22.95	30.05	38.5	33	26.55
sim 2	39.7	13.3	2.1	1.25	1.85	0.9	1	1.45	1.55	1.2	1.2	1.45		2.5	1.55	2.5	7.6	5.5	21.6	14.8	11.65	16.35	37.75	20.85	32.6
sim 3	46.05	21.45	10.55	1.05	0.85	0.7	1.2	0.95	0.65	0.4	1.4	1.25		2.1	2.1	2.95	7.1	10.65	12.4	17.3	13.5	20	27.25	41.75	34.65
sim 4	44.75	48.55	26.05	5.9	1.85	0.85	1.05	1.05	0.7	1.7	1.2	1.5		3.1	1.5	1.8	2.5	9.3	6.3	11.1	24.8	13.5	14	17.85	26.8
sim 5	26.1	12.15	2.55	1.1	0.4	0.95	1.35	0.75	1.55	2.75	1.05	1		1.35	2.25	2.35	5.3	3.85	8.25	8	18.2	7.1	22.4	13.2	21.75
sim 6	49.85	24.95	5.95	1.3	1.4	0.55	1.3	0.65	0.75	0.8	1.65	1.75		2.8	1.4	7.9	5.05	2	21.35	24.3	18.65	29.85	16.15	25.35	23.6
sim 7	49.9	34.85	28.75	1.05	2.35	0.95	1.15	0.6	0.75	0.75	1.05	1.75		2.35	2.15	2.1	1.25	7.55	7.55	9.5	23.3	16.45	13.05	18.7	34.05
sim 8	44.9	38.05	23	3.55	1.05	1.3	0.5	0.45	0.5	0.85	0.55	1.8		2.3	2	10.75	5.4	15.3	11.75	11.15	16.9	19.45	31.75	37.85	15.7
sim 9	49.35	46.9	18.6	6.2	2.3	1.05	0.5	1.15	0.75	1.5	1.85	1.1		1.25	2.85	9.65	5	10.2	3.7	12.15	15.7	20.7	31.5	19.25	33.6
sim 10	43.9	30	3.5	1.6	0.75	0.6	0.45	1.1	1.05	1.35	1.05	1.55		2.35	3.45	4.65	4.3	6.05	7.15	12.2	15.4	28.2	14.4	34.35	29.3
n	10	10	10	10	10	10	10	10	10	10	10	10		10	10	10	10	10	10	10	10	10	10	10	10
mean	43.895	28.855	13.365	2.375	1.335	0.89	0.965	0.855	0.935	1.36	1.37	1.455		2.195	2.12	4.94	4.96	7.425	10.215	13.375	18.105	20.165	24.675	26.215	27.86
sd	7.00977	13.0672	10.1243	2.08796	0.718428	0.227058	0.34805	0.339485	0.36897	0.733636	0.588407	0.275328		0.584261	0.631664	3.3228	1.92697	4.00328	6.70589	4.63946	4.38453	7.45632	9.98819	9.79118	6.21909
serr	2.21668	4.13221	3.2016	0.660271	0.227187	0.0718022	0.110063	0.107355	0.116679	0.231996	0.18607	0.0870664		0.18476	0.19975	1.05076	0.609362	1.26595	2.12059	1.46713	1.38651	2.3579	3.15854	3.09624	1.96665
Male present
Avg latency (sess of 20 trials)	1	2	3	4	5	6	7	8	9	10	11	12		1	2	3	4	5	6	7	8	9	10	11	12
sim 1	47.6	43.25	30.55	12.7	4.25	4.1	3.65	0.75	2.25	2.1	2.45	2.85		6.65	22.7	18.75	21.3	29.75	31.35	32.8	38.15	31.75	36.35	19.15	42.75
sim 2	47.05	37.8	26.35	22.75	9.3	3.2	4.25	3.4	3.05	2.2	2.5	2.25		6	10.85	10.7	17.75	15.65	30.35	39.15	36.05	40.05	29.4	35.8	25.45
sim 3	45.8	50.35	50	39.95	21.3	12.05	5.7	2.9	3.65	2.45	2.75	5.6		4.9	6.25	12.85	20.25	25.9	25.95	29.55	37.95	37.3	32.65	31	40.05
sim 4	41.6	45.75	41.2	31.3	14.3	8.55	4.5	3.65	2.2	2.15	2.8	4.05		1.85	11.9	5.3	16.8	16.1	29	24.95	24.55	34.55	34.15	29.1	47.25
sim 5	37.55	32.5	17.95	8.7	3.45	3.45	2.75	1.85	2.45	3.6	2.7	1.8		10.5	6.85	14.8	14.7	21.65	36.65	35.15	29	28.7	30.65	40.2	25.7
sim 6	40.75	43.9	19.65	9.5	3.15	4.25	4.35	4.75	1.35	2.3	4	2.15		2.95	9.4	17.5	10.85	40.8	16.15	30.55	29.1	18.6	31.25	33.9	36.55
sim 7	46.2	36.9	23.25	12.3	2.8	5.25	3.05	2.4	2.2	6	3.35	1.9		4.65	9.3	8.85	8.9	19.25	19.65	31.3	37.65	28.5	43.25	26.45	38.65
sim 8	52.25	44	41.45	31.4	17.4	5.65	2.5	3.2	3.9	2.75	2.7	1.25		12.15	14.85	22.65	33.4	21.3	40.8	22.35	38.05	29.25	27.15	21	32.95
sim 9	36.2	35.6	16.8	12.75	6.4	5.8	2.15	2.85	3.95	1.75	2.85	2		6.5	9.9	12.65	13.65	38.25	19.7	39.45	33.1	33.25	24.7	38.85	43.3
sim 10	50.45	49.05	23.75	23.6	10.9	2.75	3.3	3.1	3.5	2.65	2.15	2.4		18.6	14.35	25.15	28.55	29.2	35.8	26.2	17.3	24.2	35.25	40.3	43.35
n	10	10	10	10	10	10	10	10	10	10	10	10		10	10	10	10	10	10	10	10	10	10	10	10
mean	44.545	41.91	29.095	20.495	9.325	5.505	3.62	2.885	2.85	2.795	2.825	2.625		7.475	11.635	14.92	18.615	25.785	28.54	31.145	32.09	30.615	32.48	31.575	37.6
sd	5.33127	5.93894	11.4172	10.9382	6.54362	2.84717	1.08684	1.07188	0.883805	1.23163	0.515994	1.28393		5.0034	4.78633	6.16785	7.64403	8.722	8.14841	5.72458	7.05757	6.26223	5.21479	7.64222	7.48524
serr	1.6859	1.87806	3.61043	3.45898	2.06928	0.900353	0.343689	0.338957	0.279484	0.389476	0.163172	0.406014		1.58221	1.51357	1.95044	2.41725	2.75814	2.57675	1.81027	2.2318	1.98029	1.64906	2.41668	2.36704
Male absent
Avg latency (sess of 20 trials)	1	2	3	4	5	6	7	8	9	10	11	12		1	2	3	4	5	6	7	8	9	10	11	12
sim 1	52.7	41.8	30.25	25.7	12.85	12.3	2.6	7.7	5.5	2.5	3.2	1.9		12.75	12.45	23.75	30.65	33.25	21.5	25.55	32.8	36.4	33.35	38.25	32.15
sim 2	46.85	43	47.7	34.2	34.1	17.15	6	8.7	4.25	2.3	3.05	1.4		4.45	15.95	15.4	17	27.2	33.1	32.95	30.55	49.1	31.1	23.2	39.25
sim 3	41.15	41.65	25.9	5.75	5.1	5.9	2.15	4.75	2.05	2.85	2.1	2.85		3.1	16.85	21.4	20.2	11.35	22.5	29.05	17.75	21.55	31.55	25.55	42.75
sim 4	50	48.05	45.65	41.9	24.75	26.75	6.8	8.3	2.7	2.65	3.45	2.55		11.9	9.2	23.4	26.45	28.9	34.4	28.55	27.35	26.3	41.05	46.45	34
sim 5	41.75	49.6	49.5	35.15	40.65	20.55	5.9	6.3	3.45	4.3	1.3	3.85		10.55	9.4	9.8	17.95	37	31.2	26.1	30.25	30.8	42.5	44.15	36.7
sim 6	32.9	47.9	38.5	29.3	25.15	22.7	5.1	1.5	5.9	4.15	1.8	4.55		7.35	27.4	8.45	26.05	14.4	26.05	21.9	32.85	43.45	29.95	36.7	42.2
sim 7	51.8	46.35	41	36.45	24.85	22.05	15.7	7.5	4.15	4.25	3.8	2.6		6.1	20.2	25.15	9.05	23.75	21.8	29.75	43.9	31.85	41.85	34.4	31.3
sim 8	44.65	44.75	30.65	37.1	13.85	14.35	6.75	4.55	3.3	2.35	3.65	1.95		4.4	11.8	9.45	17.4	18.2	29.7	24.15	31.95	37.75	46.05	25.7	43.95
sim 9	41.5	46.45	36.95	28.45	15.1	6.6	4.7	2.75	2.1	4.65	5.05	4.9		3.15	7.9	22.4	24	17.1	22.9	30.75	30.25	32.35	40.7	39.2	38.35
sim 10	47.35	41	31.45	11.9	11.9	13.5	2.8	3.85	1.85	4.7	1.75	3.15		1.8	7.85	24.4	17	26.25	21.75	16.85	21.65	38.85	32.3	35.55	29.3
n	10	10	10	10	10	10	10	10	10	10	10	10		10	10	10	10	10	10	10	10	10	10	10	10
mean	45.065	45.055	37.755	28.59	20.83	16.185	5.85	5.59	3.525	3.47	2.915	2.97		6.555	13.9	18.36	20.575	23.74	26.49	26.56	29.93	34.84	37.04	34.915	36.995
sd	5.9963	3.06036	8.15143	11.5227	11.0128	6.92636	3.86149	2.47721	1.42229	1.01576	1.16143	1.15499		3.92941	6.29197	6.84944	6.26477	8.34462	5.13284	4.73479	6.99334	8.06556	5.91964	7.89895	5.16056
serr	1.8962	0.967771	2.57771	3.64381	3.48254	2.19031	1.22111	0.783362	0.449768	0.321213	0.367276	0.36524		1.24259	1.9897	2.16598	1.98109	2.6388	1.62315	1.49727	2.21149	2.55055	1.87195	2.49787	1.63191

## Sheet: Fig4D
Female present
Avg latency (sess of 20 trials)	1	2	3	4	5	6	7	8	9	10	11	12		1	2	3	4	5	6	7	8	9	10	11	12
sim 1	45.2	36.65	3	0.85	0.5	0.85	0.55	0.85	1.4	1.75	1.8	1		1.15	3.95	7.3	12.1	6.8	3.55	26.9	25.9	25.4	31.5	26.7	36.05
sim 2	54	38.65	24.9	6.3	0.5	0.55	0.3	0.35	0.8	1	0.75	0.9		2.15	2.25	2.45	4.3	8.8	3.5	13.55	20.15	16.1	30.35	23.35	38.6
sim 3	51.3	32.55	7.2	1.75	0.45	1.25	0.5	0.55	1.15	1.15	1	2.1		1.65	0.85	1.3	5.15	2.7	7.75	20.85	18.6	22.45	6.95	30.05	23.25
sim 4	44.45	37.1	3.3	1.7	0.3	0.25	0.25	0.95	0.45	1.05	1.2	1.7		2.85	3.7	3.65	6.85	5.2	11.75	17.4	28.75	30.45	45.3	24.65	27.95
sim 5	38	14.3	1.9	1.2	0.1	0.45	0.75	0.55	0.5	0.5	1.4	1.4		2.5	1.4	3.25	11.4	3.7	12.55	13.25	21.3	27.15	17.3	30.5	42.55
sim 6	44.8	47.55	34.1	11.7	0.85	0.6	0.45	0.45	0.95	0.3	0.6	1.35		2.45	3.05	2.2	9	7.25	19	9.75	18.9	44.15	29.65	15.55	26.85
sim 7	42.1	6.8	2.05	0.25	1.25	0.4	1	1.15	1.8	1.7	1.35	1.2		3.85	1.55	10.85	11.6	6.55	15.05	10.9	13.9	23.1	32.8	24.9	41.1
sim 8	48.1	50.2	12.3	1.7	0.75	0.4	0.6	1.8	0.85	1.25	1	1.5		3.15	4.75	2.7	8.2	9.95	21.35	20.25	13.6	31.55	31.5	23.05	32.65
sim 9	50.35	46	41.6	14.1	1.3	0.75	0.65	0.25	0.5	1.2	1.2	2.3		1.5	1.3	5.55	6.2	8.75	20.85	25.8	24.55	29.1	23.55	29.85	19.8
sim 10	50.85	40.05	30.95	2.3	0.7	0.5	0.75	0.4	1.1	0.95	1.15	1.2		2	2.8	3.4	11.1	8.9	12.85	24.25	15.55	19.2	32.95	34.25	24.4
n	10	10	10	10	10	10	10	10	10	10	10	10		10	10	10	10	10	10	10	10	10	10	10	10
mean	46.915	34.985	16.13	4.185	0.67	0.6	0.58	0.73	0.95	1.085	1.145	1.465		2.325	2.56	4.265	8.59	6.86	12.82	18.29	20.12	26.865	28.185	26.285	31.32
sd	4.87927	14.084	15.2765	4.90584	0.386005	0.287711	0.223855	0.472699	0.431406	0.453413	0.339485	0.453413		0.81522	1.3038	2.89022	2.88433	2.38849	6.49894	6.25969	5.10758	7.81096	10.3098	5.2406	7.99973
serr	1.54296	4.45375	4.83086	1.55136	0.122066	0.0909823	0.0707892	0.149481	0.136423	0.143382	0.107355	0.143382		0.257795	0.412297	0.913967	0.912104	0.755307	2.05515	1.97949	1.61516	2.47004	3.26025	1.65722	2.52974
Female absent
Avg latency (sess of 20 trials)	1	2	3	4	5	6	7	8	9	10	11	12		1	2	3	4	5	6	7	8	9	10	11	12
sim 1	45.5	32.1	9.2	2.6	0.9	0.7	2.15	0.7	0.45	1.1	1.45	1.65		3.9	1.9	3.35	3.65	4.9	12.85	9.95	22	50.25	20.85	26.5	47
sim 2	32.85	14.6	4.55	1.2	1.05	1.05	1.05	1	0.95	1.7	1.4	2.45		0.75	3.25	2.85	5.85	5.7	15.05	10.55	21.25	19.8	21.55	27.95	28.75
sim 3	45.35	38.4	12.05	1.45	1.2	0.95	0.4	1.05	0.9	0.8	1.3	1.05		1.35	2.65	2.55	3.85	9.55	6.15	5	13.85	15.15	16.25	28.35	27.15
sim 4	46.15	45.65	19.1	2.6	0.9	1.55	1	0.65	1.6	1.45	1.6	0.95		1.3	2.85	4.95	3.6	6.6	7.65	25.15	25.45	28.45	44.2	22.4	28.2
sim 5	39.55	29.4	12.8	1.05	1.35	1.15	0.9	1.5	1	0.85	1.9	0.9		0.95	1.25	2.6	4.8	7.3	11.55	21.75	10.95	31.7	29.3	26.95	8.4
sim 6	50.15	39.75	16.3	7.25	1.35	0.75	0.7	1	1.35	1.6	0.85	1.4		2.5	4.35	3.8	2.05	12.15	16.15	15	27.1	36.3	28.55	37.05	34.15
sim 7	44.15	31.45	16.85	4.4	0.9	1.2	0.3	1	0.95	1.95	1.1	1.6		2.15	1.95	2.9	3.4	12.15	16.15	23.85	23.6	33.15	28.8	27.5	29.95
sim 8	45	50.65	36.9	4.55	5.95	0.75	0.6	0.5	0.4	0.5	1.65	1.35		2.1	2.65	2.7	6.25	6.8	10.8	11.55	11.95	20.8	30	33	15.3
sim 9	52.2	29.55	18.15	2.8	1.05	0.45	0.7	0.8	1.4	1.25	1.25	1.95		1.45	1.15	2.15	1.25	3.65	2.95	11.1	11.2	15.45	13.35	18.25	18.3
sim 10	38.2	28.3	2.85	1.85	1.35	1	1.4	0.95	0.35	1.45	1.5	1.35		2.55	1.65	3.5	7.85	4.45	9.8	17.9	21.75	18.15	15.3	32.7	41.85
n	10	10	10	10	10	10	10	10	10	10	10	10		10	10	10	10	10	10	10	10	10	10	10	10
mean	43.91	33.985	14.875	2.975	1.6	0.955	0.92	0.915	0.935	1.265	1.4	1.465		1.9	2.365	3.135	4.255	7.325	10.91	15.18	18.91	26.92	24.815	28.065	27.905
sd	5.70053	10.1395	9.51786	1.93064	1.54002	0.310421	0.53965	0.275933	0.434645	0.452186	0.296273	0.476707		0.941335	0.985464	0.805554	1.98122	3.0296	4.39847	6.72814	6.25197	11.2123	9.2756	5.36553	11.7152
serr	1.80266	3.2064	3.00981	0.610521	0.486998	0.0981637	0.170652	0.0872576	0.137447	0.142994	0.0936898	0.150748		0.297676	0.311631	0.254738	0.626518	0.958043	1.39092	2.12763	1.97705	3.54562	2.9332	1.69673	3.70469
Male present
Avg latency (sess of 20 trials)	1	2	3	4	5	6	7	8	9	10	11	12		1	2	3	4	5	6	7	8	9	10	11	12
sim 1	4.15	4.5	5.9	5.9	5.5	2.7	3.2	1.85	2.1	3.45	2.95	2.4		4.8	5.35	3.8	5.9	3.75	8.05	9.55	3.9	6.95	6.3	3.65	6.55
sim 2	46.25	42.65	42.3	37.7	25.4	10.55	3.5	2.95	3.5	3.05	2.75	4.2		2.75	8.2	13.7	22	20	30.4	32.7	27.6	37.15	26.15	33.15	30.1
sim 3	52.65	39.55	34.7	11.4	7.25	6.95	3.1	3.1	2.6	2.25	2.7	3.6		5.9	4.65	6.8	19.55	15.15	18.65	40.45	39.7	34.65	27.2	37.5	27.85
sim 4	38.7	44.35	47.15	31.9	7	3.75	5.3	4	3.35	1.9	3.05	2.75		9	4.95	9.6	14.6	27.05	27.4	30.8	37.85	22.45	35.35	38.15	39.15
sim 5	49.95	40.55	34.3	21	7.45	5.75	2.5	3.5	5.3	1.65	3.8	2.4		5	3.2	11.75	31.5	18.6	20.65	31.1	28.25	30.55	29.5	34	43
sim 6	52.65	43.7	49.6	34.9	27.1	17.55	3.1	2.9	3.05	3.25	2.55	2.95		8.3	6.8	27.4	16.8	36.2	31.7	21.35	40.7	29.3	35.15	47.2	48.6
sim 7	48.85	43.35	37.15	24.4	6.1	6.4	2.9	3.5	2.55	1.65	3.4	1.05		9.05	5.7	14.05	24.1	37.4	23.05	32.4	36.25	23.35	40.55	33.45	36.35
sim 8	52.55	51.5	49.2	44.35	36.8	43.8	15.55	4.65	6.25	2.5	5.85	2.4		5.75	7.8	15.05	23.3	33.45	23.75	26.65	39.85	35.65	27.95	42.25	22.8
sim 9	43.7	42.8	31.65	21.1	8.05	3.85	3.85	3.75	3.35	2.45	2.75	2.3		1.8	3.9	9.85	15.85	10.35	25.25	35.2	32.65	32.95	29.8	36.05	41.05
sim 10	42.5	20.75	27.3	9.55	4	6.4	2.8	3.65	2.7	2.75	2.35	2.15		1.7	11.7	14.15	21.8	23.9	38.25	27.5	38.65	30.85	41.65	32.2	47.8
n	10	10	10	10	10	10	10	10	10	10	10	10		10	10	10	10	10	10	10	10	10	10	10	10
mean	43.195	37.37	35.925	24.22	13.465	10.77	4.58	3.385	3.475	2.49	3.215	2.62		5.405	6.225	12.615	19.54	22.585	24.715	28.77	32.54	28.385	29.96	33.76	34.325
sd	14.5247	13.9567	13.037	12.8897	11.6718	12.3706	3.93222	0.750574	1.30624	0.641093	1.01682	0.850882		2.77403	2.50314	6.31682	6.83706	11.1896	8.20931	8.47553	11.1238	8.95253	9.94987	11.5508	12.8982
serr	4.59312	4.41348	4.12268	4.07607	3.69094	3.91191	1.24348	0.237352	0.413068	0.202731	0.321546	0.269072		0.877226	0.791561	1.99755	2.16207	3.53846	2.59601	2.6802	3.51765	2.83104	3.14642	3.65268	4.07876
Male absent
Avg latency (sess of 20 trials)	1	2	3	4	5	6	7	8	9	10	11	12		1	2	3	4	5	6	7	8	9	10	11	12
sim 1	47.9	30.95	32.4	21.25	12.55	4.05	9.75	5.2	5.45	2.8	1.5	2.05		3.2	13.65	15.7	6.65	27.35	37.7	27.25	30.1	37.4	26.85	31.9	37.75
sim 2	40.65	45.45	38.6	40.85	26.45	8.85	3.3	4.2	3.05	3.3	2.75	3.45		7.1	10.15	14.5	23.75	41.3	25	23.9	31.9	28.9	38.4	41.65	25.65
sim 3	47.8	49.25	43.55	26.1	39.4	30.6	6.35	5.4	2.95	3.65	2.85	2		8.85	18.25	19.85	28.05	25.65	26.85	27.25	37.4	44.95	34.6	34.6	39.4
sim 4	51.45	50.1	41.8	47.9	29.6	22.55	8.75	2.95	1.85	3.95	2.55	3.9		3.2	16.7	15.75	15.55	24.85	21.35	31.55	39.25	38.45	33.3	45.85	41.75
sim 5	35.25	34.2	11.75	19.45	7.8	2.1	2.3	3.8	4.25	3.9	2.6	3.25		3.2	6.8	11.7	23.6	20.15	36.05	19.35	16.55	29.85	40.65	46.15	38.1
sim 6	49.8	45.3	35	41.8	16.65	11.45	5.65	7.05	5	2.85	2.65	3.35		9.85	5.85	15.7	24.25	19.05	26.05	35.55	28.25	49.5	36.3	29.6	41.45
sim 7	54	47.95	48.7	46.2	21.7	22.35	8.85	6.75	5.25	6.95	1.7	5.1		5.75	13.4	10.65	17.65	21.3	40.65	23.65	22.45	26.8	33.45	35.65	43.25
sim 8	46.1	36.4	39.3	23.1	17.6	16.65	5.3	2.05	5.05	2.65	1.15	4		10.85	14.05	6.75	28	22.85	33.55	31.65	31.15	31.25	24.8	54	38.85
sim 9	47.75	45.65	30.3	28.7	19.75	15.8	3.55	3.95	3.2	4.15	2.7	3.5		1.55	13.7	15.5	21.95	28	42.75	17.25	31.8	33.15	40	29.95	44.25
sim 10	50.3	42.3	30	25.45	16.25	9.15	8.65	7.6	3.7	1.6	6.85	2.9		5.85	6.05	32.15	16.8	22.6	34.4	33.8	34.1	21.3	34.65	48.15	34.2
n	10	10	10	10	10	10	10	10	10	10	10	10		10	10	10	10	10	10	10	10	10	10	10	10
mean	47.1	42.755	35.14	32.08	20.775	14.355	6.245	4.895	3.975	3.58	2.73	3.35		5.94	11.86	15.825	20.625	25.31	32.435	27.12	30.295	34.155	34.3	39.75	38.465
sd	5.46341	6.65317	10.18	10.9017	9.08268	8.97247	2.66432	1.83189	1.2102	1.4115	1.56759	0.915605		3.18065	4.42743	6.75571	6.56228	6.34818	7.22569	6.1107	6.71162	8.53699	5.17805	8.55972	5.37634
serr	1.72768	2.10392	3.21921	3.44742	2.8722	2.83734	0.842531	0.579293	0.382699	0.446356	0.495715	0.28954		1.00581	1.40008	2.13634	2.07517	2.00747	2.28496	1.93237	2.1224	2.69963	1.63744	2.70682	1.70015

## Sheet: Fig8B
Female present
Avg latency (sess of 20 trials)	1	2	3	4	5	6	7	8	9	10	11	12		1	2	3	4	5	6	7	8	9	10	11	12
sim 1	37.4	10.3	1.3	1.4	1.05	0.65	1.15	1.4	0.85	1.25	1.55	1.7		15.45	6	7.9	10.65	19.35	22.4	13.55	33.45	24.6	20.2	21.5	30.65
sim 2	45.3	45	12.9	0.9	1.55	0.75	0.2	0.9	0.55	0.45	1.5	0.95		2.6	8	5.55	13.6	11.3	15.05	21.95	27.9	17.85	19.75	19.25	29.05
sim 3	43.4	36.35	3.7	1.75	0.4	0.55	0.45	0.65	0.5	1.2	1.5	1.75		4.45	7.15	7.8	9.4	15.9	24.5	17.1	29.2	32.3	30.1	34.2	33.25
sim 4	46.15	12.4	2.3	2.3	0.7	1.15	0.5	0.45	0.65	2.2	1	1.4		4.5	3.65	8.7	17.25	15.2	15	33.6	15.1	31	20.5	16.85	38.3
sim 5	47.6	31.55	6.55	0.9	0.6	0.7	1.75	0.65	0.9	0.85	1.65	1.85		9.1	12.9	8.25	6	22.25	19.95	28.3	20.6	38.35	15.5	29.9	35.4
sim 6	49	43.9	24.35	1.6	0.5	1.5	1.25	0.55	1	0.75	1.75	1.15		3.15	8.2	8.9	7.4	12.1	16.2	9.1	33.2	20.4	30.75	24.45	32.25
sim 7	48.55	14.85	1.95	0.7	1.5	1.1	0.4	0.75	0.65	0.65	1.35	1.8		9.7	18.05	13.05	17.55	10.45	20.95	15.25	26.95	22.3	22.7	42.15	33.95
sim 8	49.5	49.6	37.65	13.25	2.2	1.6	0.25	0.5	0.2	0.2	0.4	0.85		3.35	4.25	5.6	7.9	5.5	18.1	17.05	14.1	17.85	25.5	36.05	32.7
sim 9	42.25	29.45	2.6	1.05	1.1	0.8	1.05	0.3	0.7	1.25	1.75	1.3		8.6	2.6	3.8	15.7	12.7	18.2	14.15	27.75	18.3	16.75	28.4	36.7
sim 10	35.45	17	2.95	0.7	0.5	1.3	1.25	1.25	0.55	0.45	1.2	0.9		2.7	4.3	9.15	6.55	10.9	11.45	15.5	32.3	18.85	27.8	28.55	39.75
n	10	10	10	10	10	10	10	10	10	10	10	10		10	10	10	10	10	10	10	10	10	10	10	10
mean	44.46	29.04	9.625	2.455	1.01	1.01	0.825	0.74	0.655	0.925	1.365	1.365		6.36	7.51	7.87	11.2	13.565	18.18	18.555	26.055	24.18	22.955	28.13	34.2
sd	4.86705	14.6536	12.1714	3.82778	0.588218	0.372529	0.529281	0.35103	0.229068	0.577471	0.413689	0.39303		4.22051	4.75171	2.52699	4.47797	4.79462	3.91132	7.38867	7.10553	7.25991	5.37274	7.90995	3.35733
serr	1.5391	4.63388	3.84893	1.21045	0.186011	0.117804	0.167374	0.111006	0.0724377	0.182612	0.13082	0.124287		1.33464	1.50262	0.799104	1.41606	1.51619	1.23687	2.3365	2.24697	2.29578	1.69901	2.50135	1.06168
Female absent
Avg latency (sess of 20 trials)	1	2	3	4	5	6	7	8	9	10	11	12		1	2	3	4	5	6	7	8	9	10	11	12
sim 1	41.45	37.6	9.8	0.95	1.85	0.7	0.75	1.6	1	0.85	1.85	2.4		3.7	1.85	5	5.85	8.15	17.45	8.95	8.75	12.25	18.6	28	35.1
sim 2	54	46.75	8.6	2.95	1.7	0.5	0.45	0.95	1	0.75	1.25	2.1		6.1	2.2	4.45	3.6	10.55	10.25	12.15	29	14.95	12.95	24.4	28.5
sim 3	50.15	40.1	8.1	1.5	1.1	1.1	1.5	1.25	1	1.85	1.15	2.4		6.35	3.3	9.25	3.3	9.85	20.25	7.05	11.3	31.1	23.5	38.6	37.2
sim 4	43.05	50.35	52.7	20.4	2.15	1.1	1.25	0.85	1.2	1.35	1.35	2.3		12	10.1	12.4	4.8	6.15	16.25	23.25	17.05	23.9	38.9	29.6	31.75
sim 5	44.6	46.6	16.2	2.35	1.25	0.15	1.2	0.3	0.8	2.45	1	1.4		3.55	4.25	8.8	2.95	8.7	24.9	14.65	14.8	19	37.2	31.45	32.65
sim 6	39.8	39.05	9.2	2	0.95	1.15	0.7	1.25	0.4	1.9	1.6	1.25		4.8	6.75	4.65	4.3	5.65	8.1	13.15	28	19.9	14.55	31.1	26.95
sim 7	49.5	49.9	35.1	5.45	1.05	0.7	0.65	1.4	0.95	0.6	1.75	1.6		5.85	3.7	3.35	4.55	5.45	8.25	20.35	26.6	23.6	18.05	36.1	31
sim 8	45.8	34	10.35	2.55	0.85	1.25	1.15	0.85	1.4	1.05	0.6	0.35		5.05	2.4	4.4	3.85	11	5.1	22.25	19.05	18.65	25.6	39.25	19
sim 9	29.3	22.7	5.45	1.5	0.8	0.7	0.35	1.35	1	2.65	1.95	0.4		2.1	3.4	2.4	2.35	3.95	3.95	11.1	5.7	13.3	14.3	20.15	19.65
sim 10	47.75	50.55	36.4	12.15	1.9	1.05	0.85	1.25	1.25	0.9	1.2	1.45		4.8	2.6	1.4	2.5	12.3	5.95	10.7	10.3	19.05	25.9	28.7	26.05
n	10	10	10	10	10	10	10	10	10	10	10	10		10	10	10	10	10	10	10	10	10	10	10	10
mean	44.54	41.76	19.19	5.18	1.36	0.84	0.885	1.105	1	1.435	1.37	1.565		5.43	4.055	5.61	3.805	8.175	12.045	14.36	17.055	19.57	22.955	30.735	28.785
sd	6.86338	8.92278	16.2317	6.28305	0.493176	0.348648	0.374944	0.373757	0.271825	0.733731	0.419788	0.75977		2.64976	2.54137	3.4443	1.09657	2.77831	7.17687	5.67963	8.42818	5.61467	9.20029	6.04497	6.05025
serr	2.17039	2.82163	5.13292	1.98688	0.155956	0.110252	0.118568	0.118192	0.0859586	0.232026	0.132749	0.24026		0.837927	0.803653	1.08918	0.346767	0.87858	2.26953	1.79606	2.66522	1.77552	2.90939	1.91159	1.91326
Male present
Avg latency (sess of 20 trials)	1	2	3	4	5	6	7	8	9	10	11	12		1	2	3	4	5	6	7	8	9	10	11	12
sim 1	41.9	26.65	19.2	3.35	2.75	3.75	4.3	2.25	2.85	2.6	2.85	2.35		29.35	33.45	26.65	22.1	23.95	24.75	26.35	33.85	29.8	23.1	32.3	29.15
sim 2	42.65	43.75	40.7	32.45	23.25	8.3	7.45	3.35	4.55	2.55	2.4	2.15		13	16.6	22.25	28.75	15.85	34.9	22.8	30.25	34.75	40.55	29.9	32.65
sim 3	49.65	45	39	30	6.1	8.3	4.35	2.2	2.65	2.75	1.55	1.45		9.9	16.8	25.15	12.7	17.75	33.7	35.7	37.2	29.9	32.75	41.35	40.25
sim 4	38	21.1	16.35	5.9	9.35	3.2	1.8	2.3	3.9	2.15	2.95	2.9		8.25	18.1	7.05	11.05	16.75	27.65	30	29.4	38.2	31.5	36.35	45.25
sim 5	40.8	29.75	30.5	5.1	3.6	3.45	2.45	2.45	5.35	2.7	3.15	2.95		10.55	17.55	33.75	24.15	22.2	13.35	18.6	27.35	17.5	31.1	25.05	33.65
sim 6	50.9	33.15	39.3	34.9	7.85	8.95	2.75	3.8	4.1	3.1	2.3	1.7		8.9	20.85	23.6	27.5	25.45	30.35	39.35	42.4	34.65	31.55	39	40.5
sim 7	44.55	26.5	29.6	7.55	3.35	0.9	3.55	2.5	3.1	3.65	5.05	2.7		5.9	25.2	9.05	24.6	35.7	23.2	32.25	25.75	30.4	29.15	30.9	41.25
sim 8	41.1	34.35	25.35	20.6	5.7	3.2	2.4	4.4	2.7	2.45	4.9	2.6		4.7	18.4	19.3	22.6	25.35	30.2	40.25	29.1	24.55	42.5	42.6	38.35
sim 9	44.5	33.2	33.55	11.4	4.8	6.95	2.55	4.35	2.7	1.65	2.6	3.35		9.7	17.5	36.1	22.7	30.15	25.7	22.85	26.9	46.45	33.05	36	30.45
sim 10	47.65	46.2	37.65	29	35.6	12.75	4.3	4.7	2.45	2.45	2.9	2.65		19.15	19.1	33.15	19.5	20.75	28.9	36.05	22.8	37.55	37.25	39.65	40.05
n	10	10	10	10	10	10	10	10	10	10	10	10		10	10	10	10	10	10	10	10	10	10	10	10
mean	44.17	33.965	31.12	18.025	10.235	5.975	3.59	3.23	3.435	2.605	3.065	2.48		11.94	20.355	23.605	21.565	23.39	27.27	30.42	30.5	32.375	33.25	35.31	37.155
sd	4.13657	8.57075	8.59946	12.6771	10.7181	3.63618	1.63958	1.00835	0.982641	0.530958	1.10253	0.581282		7.296	5.25396	9.82116	5.76199	6.20724	6.14257	7.536	5.828	7.94975	5.63274	5.64387	5.3176
serr	1.3081	2.71031	2.71939	4.00884	3.38936	1.14986	0.518481	0.31887	0.310738	0.167904	0.348652	0.183818		2.3072	1.66145	3.10572	1.8221	1.9629	1.94245	2.38309	1.84297	2.51393	1.78123	1.78475	1.68157
Male absent
Avg latency (sess of 20 trials)	1	2	3	4	5	6	7	8	9	10	11	12		1	2	3	4	5	6	7	8	9	10	11	12
sim 1	44.35	41.85	40.8	30.2	19.95	4.15	5.6	3.7	3	3.05	2.9	2.8		12	17.2	21.05	19.9	24.4	41.05	29.65	17.55	43.1	35.65	43.35	42.1
sim 2	46.9	38.75	29.75	30.3	14.15	6.45	3.15	7.5	1.85	3.65	1.45	3.8		14.45	15.8	21.9	23.05	19.1	14.9	25.45	29.9	42	35.45	34.5	36.05
sim 3	38.9	42.35	40.05	34.55	3.6	11.7	9.2	2.55	6.65	4.2	2.95	2.1		26.3	21.75	30.4	29.3	34.2	31.15	21.75	26.55	22.05	34.2	17.7	38.5
sim 4	44.4	43.8	31.45	23.9	12.7	8.5	12.2	4.75	2.65	5.3	2.4	3.9		6.35	4.2	14.6	13.95	21.85	39.05	40.9	39.15	34	35.7	32.9	24.9
sim 5	39.5	39.95	28.15	25.3	15.15	4.5	4.35	4.35	4.75	2.7	1.6	4.6		12.15	6.9	20.75	29.85	16.65	33.1	37.65	31	13.8	31.3	46.25	35.85
sim 6	49.5	46	27.6	33.85	13.15	7.15	3.75	5	2.95	2.25	3.7	3.25		12.9	25.7	28.1	28.1	16.4	14.3	28.6	14.7	38.85	36.55	36.3	33.2
sim 7	36.4	47.3	32.05	29.75	15.45	6.55	3.05	2.4	4.4	7.05	3.55	2.25		6.55	21.1	21.95	21.55	28.75	20.55	31.6	43.25	28.35	33.95	41.35	30.95
sim 8	46.9	50.3	30.45	39.4	17.25	24.7	10.35	3.9	4.65	2.6	2.5	3.7		19.5	20.6	14.15	13.95	37.95	32.6	36.8	32.1	26.5	43.8	49.05	34.4
sim 9	47.85	43.15	23.4	9.2	17.5	9.9	3.65	4.2	2.25	2.95	3.15	2.2		15.95	21	22.05	31.35	35.45	26.45	39.4	31.4	33.6	30.25	30.05	38.95
sim 10	45.35	48.35	41.5	14.9	7.35	9.9	3.85	2.15	4.8	2.05	4.7	2.3		29.7	9.25	20.8	32.2	23.85	30.65	27.3	28.7	29.3	35.6	28	43.45
n	10	10	10	10	10	10	10	10	10	10	10	10		10	10	10	10	10	10	10	10	10	10	10	10
mean	44.005	44.18	32.52	27.135	13.625	9.35	5.915	4.05	3.795	3.58	2.89	3.09		15.585	16.35	21.575	24.32	25.86	28.38	31.91	29.43	31.155	35.245	35.945	35.835
sd	4.32072	3.73052	6.19768	9.20112	4.88821	5.90786	3.37384	1.56826	1.49061	1.56031	0.975762	0.883428		7.6708	7.20486	5.01405	6.8725	7.87619	9.26331	6.46485	8.60298	9.13271	3.63184	9.45294	5.44192
serr	1.36633	1.17969	1.95988	2.90965	1.54579	1.86823	1.0669	0.495928	0.471372	0.493412	0.308563	0.279364		2.42572	2.27838	1.58558	2.17327	2.49067	2.92932	2.04437	2.7205	2.88802	1.14849	2.98928	1.72089

## Sheet: Fig9B
Female present
Avg latency (sess of 20 trials)	1	2	3	4	5	6	7	8	9	10	11	12		1	2	3	4	5	6	7	8	9	10	11	12
sim 1	30.75	10.3	1.4	1.25	0.25	0.15	0.9	0.05	0.55	0.1	0.2	0.75		0.45	0.95	1.05	0.5	1.1	0.7	1	1.55	4.85	1.55	10.9	16.1
sim 2	28.65	22.1	3.35	0.9	0.35	1.3	0.25	0.2	0.05	0.4	0.4	0.7		0.2	0.7	1.6	0.5	1.3	2.1	1.65	1.7	1.6	2.55	5.1	14.85
sim 3	35.4	37.4	7	4.1	1.1	0.85	0.3	0.6	0.6	0.4	0.05	0.35		0.5	0.4	2.05	0.45	0.75	2.1	0.45	0.8	3.5	3.1	5.8	12.7
sim 4	37.45	34.85	14.85	5.85	0.15	0.5	0.45	0.1	0.3	0.65	0.3	0.4		0.9	1.45	3.05	0.75	1.6	0.95	1.25	1.7	7.1	4.55	9.85	11.6
sim 5	36.05	13.75	1.2	1	0.15	0.2	1.1	0.35	0.2	0.3	0.05	0.3		0.45	0.55	0.95	1.75	0.5	1.3	1.35	2.6	8.05	6.2	3.95	8
sim 6	26.6	3.4	1	0.2	1.05	0.25	0.15	0.35	0.15	0.75	0.35	0.6		0.5	0.55	0.65	1.35	3.5	1.1	1.35	1.35	1.1	6.6	7.1	18.9
sim 7	33.75	33.95	29.5	7.3	3.65	0.5	1.1	0.1	1.05	0.3	0.45	0.05		1.2	0.25	0.5	0.85	0.7	0.6	1.75	0.8	4.2	5.2	2.3	2.25
sim 8	33.9	26.35	8.2	7.55	1.3	0.6	0.5	0.6	0.75	0.45	0.2	0.3		2.7	0.65	0.2	0.6	1.65	0.9	5.4	1.7	8.2	7.4	7.55	18.2
sim 9	29.25	11.95	1.35	1	0.15	0.2	0.25	0.4	0.85	0.45	0.4	0.55		1.25	0.4	0.45	0.55	2.9	1.35	7.65	6.25	9.85	17.5	4.5	9.5
sim 10	31.1	23.5	1.95	0.85	0.2	0.25	0.8	0.1	0.35	1.1	0.35	1.3		0.2	1	2.55	0.9	0.55	2.4	1.8	0.45	3.9	1	8.55	7.85
n	10	10	10	10	10	10	10	10	10	10	10	10		10	10	10	10	10	10	10	10	10	10	10	10
mean	32.29	21.755	6.98	3	0.835	0.48	0.58	0.285	0.485	0.49	0.275	0.53		0.835	0.69	1.305	0.82	1.455	1.35	2.365	1.89	5.235	5.565	6.56	11.995
sd	3.55612	11.6313	9.07411	2.91471	1.08757	0.364539	0.364539	0.206895	0.329182	0.280674	0.143856	0.34335		0.753897	0.356526	0.969378	0.424395	1.01529	0.635959	2.28972	1.64921	2.94043	4.72082	2.72446	5.22991
serr	1.12454	3.67814	2.86949	0.921713	0.343919	0.115277	0.115277	0.065426	0.104097	0.0887568	0.0454911	0.108577		0.238403	0.112744	0.306544	0.134205	0.321062	0.201108	0.724072	0.521526	0.929846	1.49285	0.861549	1.65384
Female absent
Avg latency (sess of 20 trials)	1	2	3	4	5	6	7	8	9	10	11	12		1	2	3	4	5	6	7	8	9	10	11	12
sim 1	17.75	22.9	1.05	0.65	0.65	0.15	0.05	0.2	0.15	0.25	0.7	0.45		0.55	0.4	1.5	1.3	2.85	10.8	7.85	2.75	14.95	12.9	17.55	34.05
sim 2	30.45	7.45	1.9	0.45	0.05	0.2	0.2	0.15	0.65	0.4	1	0.35		0.2	1.45	2.7	1.2	4.95	8	2.65	12.8	7.5	8.65	15.9	10.1
sim 3	9.7	8.25	0.9	0.75	0.5	0.35	0.55	0.25	0.1	0.4	0.05	0.45		0.8	0.7	0.85	0.55	6.55	1.55	3.2	7.9	10.85	19.35	17.2	19.75
sim 4	36.15	25.75	6.95	2.25	0.05	0.55	0.35	0.45	0.1	0.25	0.1	0.3		0.75	0.6	1.55	0.9	1.45	2.15	12.65	2.1	9.45	9.6	10.2	15.05
sim 5	27.3	25.65	2.3	1.5	0.1	0.15	0.3	0.05	0.25	0.5	0.2	0.65		1.15	0.55	1.1	0.95	6.5	5.3	15.7	7.55	9.5	4	22.1	17.35
sim 6	39	29.65	28.75	1.9	0.95	2.55	0.25	0.15	0.15	0.1	0.3	0.15		0.45	0.3	0.25	0.65	0.2	4.2	3.05	2.3	4	3.55	3.6	15.6
sim 7	27.95	22.4	1.5	1.15	0.1	0.1	0.3	0.05	0.25	0.3	0.8	0.4		0.5	0.6	0.6	1	2.8	11.45	5.8	2.2	4.5	6.25	14.7	25
sim 8	28.4	14.95	1.6	0.6	0.4	0.6	0.3	1.15	0.15	0.2	0.3	0.2		0.45	1.55	1.6	2.75	4.45	6.2	6.4	3.45	9.2	8.75	15.45	23.9
sim 9	35.25	25.8	1.95	0.3	1.2	0.2	0.15	0.25	0.3	0.1	0.35	0.75		0.7	0.3	0.3	2.9	1.5	1.8	8.65	12.35	5.1	13.1	8.75	14.1
sim 10	34.75	13.5	6.8	0.4	0.1	0.1	0	0.1	0	0.75	0.15	0.65		0.3	0.4	0.6	0.6	0.95	6.6	1.9	2.35	6.5	4.55	5.05	23.05
n	10	10	10	10	10	10	10	10	10	10	10	10		10	10	10	10	10	10	10	10	10	10	10	10
mean	28.67	19.63	5.37	0.995	0.41	0.495	0.245	0.28	0.21	0.325	0.395	0.435		0.585	0.685	1.105	1.28	3.22	5.805	6.785	5.575	8.155	9.07	13.05	19.795
sd	8.99176	7.94331	8.51248	0.678417	0.412176	0.744032	0.157145	0.327618	0.177639	0.197554	0.324423	0.198676		0.274924	0.450339	0.75257	0.850882	2.28597	3.53957	4.56278	4.2752	3.35223	4.96327	5.92448	6.91425
serr	2.84344	2.5119	2.69188	0.214534	0.130341	0.235284	0.0496935	0.103602	0.0561743	0.0624722	0.102591	0.0628269		0.0869387	0.14241	0.237983	0.269072	0.722888	1.11931	1.44288	1.35194	1.06007	1.56952	1.87348	2.18648
Male present
Avg latency (sess of 20 trials)	1	2	3	4	5	6	7	8	9	10	11	12		1	2	3	4	5	6	7	8	9	10	11	12
sim 1	28.35	34.9	19.6	11.85	11.1	2.65	3.55	1	2.9	1.5	1.5	2.45		6.05	2.2	6.5	5.25	7.95	18	21.15	15.45	33	14.85	29.2	29.6
sim 2	28.6	36.85	31.25	29.15	6.15	22.05	6.7	3.6	1.75	4.95	4	1		5.25	9.75	4.15	14.25	7.15	21.55	15.2	13.85	17.85	19.6	26.05	32
sim 3	34.85	31.9	36.1	11.55	6.9	6.9	8.3	3.4	2.8	5.1	1	2		0.95	3.85	5	3.6	26.8	10.95	14.55	18.95	8.9	26.1	19.85	30.85
sim 4	39	23.7	36.85	21.35	11.45	4.75	1.9	3.45	1.6	3	2	0.7		4.35	4.6	9.85	21.4	9.4	23.6	14.65	19.65	33.75	21.5	28.6	22.4
sim 5	33.05	33.75	21.5	20.2	7.5	17.75	1.75	4.9	0.9	3.3	1.65	1.55		4.95	2.1	8.7	6.55	8.95	11.25	12.15	25.7	23.15	23.35	26.25	16.7
sim 6	34.15	32	21.25	14.6	6.6	5.35	1.1	2.7	1.5	3.75	0.55	3.75		5.75	2.85	5.25	12.75	7.45	21.05	11.45	19.2	8.7	17.95	28.05	31.6
sim 7	22.65	27.2	12.7	3	20.05	9.95	3.15	4.6	2.6	3.7	0.55	1.7		1.65	2.75	12.25	1.2	4.4	4.55	6.3	10.35	23.85	31.05	23.55	19.75
sim 8	37	27.5	36.1	22.4	8.15	17.55	3.95	3.1	2	2.4	1.65	5.2		2.8	2	3.8	8.55	7.05	27.5	28.35	15.1	24.8	23.45	31.35	13.45
sim 9	34.9	15.15	13.15	26.7	12.35	4.6	2.65	3.4	2.65	2.9	0.85	1.35		2	6.8	4.9	5	11.65	15.65	31.8	31.5	26.95	20.75	30.2	15.5
sim 10	28.1	22.85	23.65	22.25	4.65	2.05	17.25	3.55	6.45	2.5	1.15	2.55		1.55	1.25	9.4	6.75	8.3	13	16.45	28.55	32.25	15.35	24.5	18.15
n	10	10	10	10	10	10	10	10	10	10	10	10		10	10	10	10	10	10	10	10	10	10	10	10
mean	32.065	28.58	25.215	18.305	9.49	9.36	5.03	3.37	2.515	3.31	1.49	2.225		3.53	3.815	6.98	8.53	9.91	16.71	17.205	19.83	23.32	21.395	26.76	23
sd	4.98587	6.64886	9.27632	7.94811	4.49103	7.17522	4.84614	1.05862	1.5299	1.11873	1.00797	1.36244		1.94111	2.62975	2.87549	6.00468	6.21936	6.94073	7.80703	6.79114	9.12573	4.92496	3.46136	7.31612
serr	1.57667	2.10255	2.93343	2.51341	1.42019	2.269	1.53249	0.334764	0.483796	0.353773	0.318748	0.430842		0.613831	0.8316	0.90931	1.89885	1.96673	2.19485	2.4688	2.14755	2.88581	1.55741	1.09458	2.31356
Male absent
Avg latency (sess of 20 trials)	1	2	3	4	5	6	7	8	9	10	11	12		1	2	3	4	5	6	7	8	9	10	11	12
sim 1	36.15	32.55	31.05	13.35	10.85	5.8	0.9	1.1	4.35	1.15	1.55	1.95		1.6	8.3	8.1	8.5	20.45	17.8	15.9	9.3	20.5	17.95	22.2	27.65
sim 2	18.25	11.35	11.8	6.9	2.25	2.15	6.15	1.35	0.85	2.1	1.8	2.35		1.85	3.45	6.3	17.55	7.05	19.75	7.3	13.4	26.7	17.85	28.1	29.05
sim 3	38.05	32.55	16.6	19.6	11.8	4.15	1.7	3.15	1.35	0.85	1.6	2.85		3.9	1.3	4.05	8.45	21.55	21.35	25.75	14.35	27.7	26.45	22.55	38.15
sim 4	35.55	21.35	27.3	17.1	6.85	8.05	2.7	2.75	2	1.2	2.4	2.4		4.15	2.45	4.6	5.6	15.6	16.35	34.65	14.5	33.6	37	23	22.6
sim 5	36.9	39	35.65	10.05	2.9	4.05	1.95	2.85	1.45	0.95	1.6	2.5		3.05	3.45	3.4	17.3	3.05	26.35	17.05	26.3	12	37.85	19.85	34.05
sim 6	32	27.3	27.4	6.45	2	3.4	1.8	2.35	3.2	2.85	0.75	0.95		2.6	4.25	10.4	6.8	18.5	29.4	14.75	16.9	21.7	18.35	12.45	17.9
sim 7	30.9	17.85	17	3.95	2	6.25	1.45	4.7	1.1	3.25	2	0.85		3.1	3.2	8.5	11.15	6.9	15	29.75	17.75	23.4	19.5	21.35	35.45
sim 8	33.35	37.15	14.3	14.2	2.6	2.35	4.15	0.8	1.05	2.45	3.15	2.7		3.15	1.3	1.85	3.85	11.5	8.2	11.1	9.8	30.85	33.95	32.25	12.6
sim 9	31.4	19.4	11.7	2.05	3.55	1.25	5.05	1.2	1.8	1.5	5	2.85		1.7	1.3	5	4.25	14.8	18.8	10.9	16.55	17.75	20.2	23.45	25.9
sim 10	26	14.85	6.65	9.4	2.55	4.35	0.6	2.3	0.6	1.4	2.35	1.95		1.95	0.55	3.1	4.7	7.6	9.65	12.25	19.4	18.1	33.8	15.75	17.5
n	10	10	10	10	10	10	10	10	10	10	10	10		10	10	10	10	10	10	10	10	10	10	10	10
mean	31.855	25.335	19.945	10.305	4.735	4.18	2.645	2.255	1.775	1.77	2.22	2.135		2.705	2.955	5.53	8.815	12.7	18.265	17.94	15.825	23.23	26.29	22.095	26.085
sd	5.95056	9.70077	9.67498	5.7046	3.75678	2.07086	1.85838	1.19128	1.16506	0.841031	1.16648	0.723821		0.914831	2.23737	2.72959	5.06404	6.42028	6.59487	9.04777	4.90557	6.58201	8.5014	5.58706	8.45031
serr	1.88173	3.06765	3.0595	1.80395	1.188	0.654862	0.587672	0.376715	0.368424	0.265957	0.368872	0.228892		0.289295	0.707517	0.863172	1.60139	2.03027	2.08548	2.86116	1.55128	2.08142	2.68838	1.76678	2.67222

## Sheet: Fig11C
Female present
Avg latency (sess of 20 trials)	1	2	3	4	5	6	7	8	9	10	11	12		1	2	3	4	5	6	7	8	9	10	11	12
sim 1	46.7	26.45	6.15	1.35	0.2	0.3	0.25	0.2	0.05	0.25	0.3	0.45		0.5	0.65	1.85	1.85	3.05	4.15	5.9	12.8	13.35	12.4	26.75	16.65
sim 2	51.75	41.45	25.35	3.3	1.15	0.55	0.2	0.1	0.3	0.1	0.3	0.4		0.75	1.35	2.3	2.85	4.65	7.75	8.55	15.9	16.45	25.3	24	27.45
sim 3	54	47.6	23	6.95	1.3	0.65	0.45	0.15	0.35	0.2	0.45	0.25		0.45	1.55	1.25	1.95	2.9	7.85	5.65	8.75	12.9	17.9	32.45	23.5
sim 4	36.8	27.3	7.55	0.45	0.3	0.15	0.05	0.05	0.25	0.25	0.25	0.55		1.1	1.25	1.2	2.35	3.1	6.75	8.05	20.9	13.35	19.75	21.9	20.85
sim 5	47.3	47.8	28.2	5	1.4	0.45	0.1	0.3	0.05	0.2	0.4	0.15		0.9	1.5	2	1.8	4.2	5.65	8.85	5.85	7.7	20.9	33.25	37.55
sim 6	50.7	47.4	33.15	4.9	0.9	0.3	0.2	0.15	0.15	0.2	0.1	0.25		0.5	0.65	0.7	1.85	2.85	3.6	5.5	12.75	20.5	22.5	20.7	21.65
sim 7	54	48.2	43.75	35.55	3.65	1	0.55	0.3	0.25	0.05	0.2	0.45		0.55	0.35	0.65	2.05	1.6	4.1	4.05	6.65	6.95	18.3	20.45	26.2
sim 8	42.6	43.5	12.25	2.65	0.95	0.35	0.1	0.15	0.05	0.25	0.1	0.25		0.3	0.9	1.1	0.7	3.3	7.6	9.85	10.8	10.8	23.5	27.55	23.1
sim 9	38.05	36.4	6.45	1.7	0.45	0.5	0.05	0.2	0.2	0.05	0.35	0.55		0.45	1.2	1.85	1.95	2.95	5.5	5.65	8.75	21.65	15.55	23.3	26.55
sim 10	50.35	51.25	50.8	36.95	6	2	0.35	0.15	0.1	0.15	0.25	0.1		0.55	0.2	0.8	1.1	1.75	0.75	3.65	2.85	4.75	6.45	9.6	21.65
n	10	10	10	10	10	10	10	10	10	10	10	10		10	10	10	10	10	10	10	10	10	10	10	10
mean	47.225	41.735	23.665	9.88	1.63	0.625	0.23	0.175	0.175	0.17	0.27	0.34		0.605	0.96	1.37	1.845	3.035	5.37	6.57	10.6	12.84	18.255	23.995	24.515
sd	6.22407	8.87734	15.7996	14.0361	1.81876	0.537096	0.171917	0.0790569	0.111181	0.0788811	0.11595	0.161245		0.24089	0.480625	0.589821	0.596029	0.931561	2.26975	2.11426	5.25732	5.5834	5.63202	6.77317	5.58018
serr	1.96822	2.80726	4.99628	4.43859	0.575142	0.169845	0.054365	0.025	0.0351584	0.0249444	0.0366667	0.0509902		0.076176	0.151987	0.186518	0.188481	0.294585	0.717759	0.668589	1.66251	1.76563	1.781	2.14186	1.76461
Female absent
Avg latency (sess of 20 trials)	1	2	3	4	5	6	7	8	9	10	11	12		1	2	3	4	5	6	7	8	9	10	11	12
sim 1	54	46.5	41.55	16.3	3.65	1.6	0.55	0.35	0.65	0.25	0.15	0.5		0.45	0.7	1.3	1.15	1.85	4.25	4.05	5.5	3.2	11.8	5.05	12.8
sim 2	51.75	41.7	43.2	12.75	1.85	0.85	0.55	0.5	0.2	0.2	0.25	0.25		1.05	0.9	0.55	1	2.1	1.95	6	2.75	8.5	13.1	10.5	17.9
sim 3	44.05	34.45	10.95	1.8	0.85	0.65	0.5	0.5	0.2	0.4	0.7	0.6		0.6	0.75	1.1	3.25	2.2	3.55	2.65	9.1	13.05	13.1	13.75	20.75
sim 4	40.75	39.1	19.7	2.25	1.55	0.7	0.5	0.2	0.3	0.2	0.25	0.5		1.3	0.7	0.9	1.4	2.05	7.1	3.35	6	9.15	10.45	25.1	16.35
sim 5	52.15	34.95	18.4	3.8	1	1	1.05	0.25	0.15	0.35	0.8	0.75		0.5	1.8	1.75	1.05	3.55	1.55	5	4.35	8.1	9.55	19.35	26.75
sim 6	46.15	29.95	12.2	3.1	1.85	1.05	0.5	0.6	0.45	0.45	0.6	0.75		1.2	1.4	1.45	1.65	1.8	4.7	3.05	6.3	15.25	20.65	20.3	26.75
sim 7	51.75	46.95	41.9	28.3	5.65	1.45	0.4	0.5	0.2	0.35	0.15	0.65		0.05	0.9	0.9	1	1.85	2.85	2.8	4.15	4.35	6.3	10.8	24.45
sim 8	43.75	25.65	10.3	1.85	1.25	0.4	0.2	0.15	0.2	0.25	0.55	0.3		1.3	1.35	1.5	2.9	2.5	3.6	3.35	3.95	11.9	16.55	25	17.65
sim 9	47.05	43.3	36.4	9.15	2.2	1.1	0.3	0.6	0.6	0.55	0.4	0.5		0.55	0.45	0.7	1.95	1.25	3.15	4.55	3.35	7.5	7.05	17.95	13.45
sim 10	52.05	46.3	47.45	39.85	20.25	3.35	1.1	0.9	0.85	0.4	0.5	0.1		0.7	0.3	0.85	0.9	2.45	2.25	2.95	2.8	3.5	7	9.85	11.85
n	10	10	10	10	10	10	10	10	10	10	10	10		10	10	10	10	10	10	10	10	10	10	10	10
mean	48.345	38.885	28.205	11.915	4.01	1.215	0.565	0.455	0.38	0.34	0.435	0.49		0.77	0.925	1.1	1.625	2.16	3.495	3.775	4.825	8.45	11.555	15.765	18.87
sd	4.55963	7.42092	15.1693	12.9829	5.8867	0.832016	0.291595	0.225401	0.24404	0.114988	0.231	0.215767		0.421769	0.462031	0.387298	0.835747	0.605438	1.60856	1.10107	1.95267	4.07833	4.55097	6.80564	5.60893
serr	1.44188	2.3467	4.79696	4.10554	1.86154	0.263106	0.0922105	0.071278	0.0771722	0.0363624	0.0730487	0.0682316		0.133375	0.146107	0.122474	0.264286	0.191456	0.508672	0.34819	0.617488	1.28968	1.43914	2.15213	1.7737
Male present
Avg latency (sess of 20 trials)	1	2	3	4	5	6	7	8	9	10	11	12		1	2	3	4	5	6	7	8	9	10	11	12
sim 1	38.65	52.75	33.3	30.35	8.05	4.55	2.95	1.7	3.65	2.15	1.75	3.15		6.85	6.75	13.65	17	26.6	18.4	20.05	25.65	29.3	35.65	30.3	35.05
sim 2	50.3	54	46.55	50.15	49.65	44.9	26	22.85	8.05	4.25	2.65	2.05		2.05	7.35	6.75	11.3	14	13.3	21.55	35.75	25.95	26.05	34.75	33.15
sim 3	43.7	52.55	47.95	29.05	28.6	8.05	2.8	2.7	3.25	2.9	2.05	3.5		5.6	5.85	13.25	9.8	17.2	24.05	20.75	13.25	27.1	42.35	36.45	29.55
sim 4	51.75	52.1	49.15	54	49.5	30.9	45.25	10.1	10.3	3.3	2.35	1.6		5.75	7.15	7.6	16.3	16.55	24.35	27.3	19.25	31.05	42.75	34.95	27.05
sim 5	46.05	47.5	38.35	31	13.15	4.35	3.6	3.5	1.65	2.75	2.55	2.05		7.25	11.05	21.55	15.3	12.15	22.7	23.15	20.1	38.15	37	35.15	38.8
sim 6	50	43.95	29.95	21.1	6.45	5.25	3.55	3.05	2.65	1.95	2.45	2.6		3.85	6.2	8.15	16.55	12.65	27.35	37.8	14	26.25	29.25	28.05	40.2
sim 7	49.7	35.4	34.05	41.5	10.8	5.85	2.9	2.4	2.7	2.3	3.95	3.05		3.1	7.7	4.5	12.8	21.8	29.6	21.45	25.1	33.45	20.85	24.8	34.65
sim 8	45.5	41.4	32.8	23.5	9.25	5.5	2.15	1.5	3.2	1.9	2.95	1.9		6.45	7.85	9.25	10.25	17.35	17	18.65	27.1	26.8	33.15	45.9	48.45
sim 9	49.85	48.35	37.1	27.85	10.85	5.35	3.35	1.9	1.55	2.9	3.2	2.5		3.8	4.8	8.25	6.8	15.8	14.5	17.1	18.75	34.6	26.2	35.35	27.05
sim 10	50.1	45.7	45.95	31.35	25.15	7.85	4.8	3.05	3	2.1	2.4	1.65		1.75	5.5	8.75	14.15	15.5	30	28.8	24.95	25.55	33.3	22.35	38.1
n	10	10	10	10	10	10	10	10	10	10	10	10		10	10	10	10	10	10	10	10	10	10	10	10
mean	47.56	47.37	39.515	33.985	21.145	12.255	9.735	5.275	4	2.65	2.63	2.405		4.645	7.02	10.17	13.025	16.96	22.125	23.66	22.39	29.82	32.655	32.805	35.205
sd	4.0566	5.93006	7.20451	10.9818	16.6466	13.9669	14.3962	6.65442	2.85686	0.733712	0.619229	0.661837		1.99687	1.72791	4.85548	3.42006	4.35487	6.05843	6.13586	6.72874	4.34193	7.15431	6.72803	6.59316
serr	1.28281	1.87525	2.27827	3.47275	5.26413	4.41673	4.55248	2.10431	0.903419	0.23202	0.195817	0.209291		0.631464	0.546413	1.53544	1.08152	1.37713	1.91584	1.94033	2.12782	1.37304	2.26239	2.12759	2.08494
Male absent
Avg latency (sess of 20 trials)	1	2	3	4	5	6	7	8	9	10	11	12		1	2	3	4	5	6	7	8	9	10	11	12
sim 1	54	52.3	52.3	47.45	38.45	37.3	41.55	35.9	6.95	6.15	3.85	3.3		3.8	3.4	8.3	5.85	11.65	19.35	23.05	33.8	29.65	34.1	43.25	41.45
sim 2	51.35	51.95	50.5	54	51.7	37.8	32.85	39.05	10.55	7.25	5.5	3.2		3.55	5.8	15.2	8	5.15	23.6	16.2	21.45	32.45	34.3	34.7	36.65
sim 3	54	45.35	46.1	44.55	34.65	37.1	18.25	7.4	4.6	4.1	2.8	3.1		3.05	3.2	4.2	9.9	14.15	13.9	26.4	30.2	18.55	31.05	37.85	36.85
sim 4	50.45	42.85	50.35	43.15	46.8	29.3	22.05	8.15	4.6	4.05	4.15	3.2		3.55	4.15	6.35	4.95	7	17.95	16.55	22.6	21.6	23.1	31.3	26.2
sim 5	46.65	39.55	40.4	45.35	29.1	35.6	13.05	8.05	3.55	3.05	2.5	3.25		4.8	3.95	4.95	9.6	17.6	15.35	21.2	21.25	25.9	30.85	30.85	40.75
sim 6	50.05	49.6	49.8	48.6	37.65	35	30.2	18	5.4	4.7	3.35	4		4.8	4.25	5.4	6	15.65	22.35	15.5	27.8	25.35	27.6	29.9	31.75
sim 7	40.4	51.4	48.25	47.3	50.35	37	23.75	17.6	8.75	5.15	3.65	1.95		3.55	7.95	10.55	15	24.6	31	29.1	30.85	23.05	44.25	34.3	37.5
sim 8	48.7	48.8	47.75	46.6	38.25	26.45	9.65	7.9	3.35	4.3	2.65	2.5		3.8	5.8	7.9	15.3	23.15	18.6	26.7	28.3	24.55	34.45	30.45	29.6
sim 9	38.1	41.25	41.7	33.55	16.75	6.35	6.3	4.3	3.05	1.7	2.5	3.4		3.95	8.75	5.55	13.75	22.55	13.35	25.5	18.7	27.15	34.55	40.85	36.7
sim 10	46.75	47.45	50.85	49.35	42.6	41.3	38.45	16.5	9	6.25	2.8	3		4.6	5.5	7.3	9.85	10.3	17.95	29.4	19.05	17.2	34.5	21.05	27.1
n	10	10	10	10	10	10	10	10	10	10	10	10		10	10	10	10	10	10	10	10	10	10	10	10
mean	48.045	47.05	47.8	45.99	38.63	32.32	23.61	16.285	5.98	4.67	3.375	3.09		3.945	5.275	7.57	9.82	15.18	19.34	22.96	25.4	24.545	32.875	33.45	34.455
sd	5.30254	4.60241	3.97786	5.28923	10.4202	10.0895	12.0558	12.1774	2.67023	1.62843	0.950804	0.545079		0.596494	1.87754	3.27127	3.79687	6.81095	5.25958	5.34363	5.40935	4.69772	5.494	6.31744	5.44214
serr	1.67681	1.45541	1.25791	1.6726	3.29516	3.19058	3.81239	3.85082	0.8444	0.514954	0.300671	0.172369		0.188628	0.593729	1.03447	1.20068	2.15381	1.66323	1.6898	1.71059	1.48555	1.73736	1.99775	1.72096

## Sheet: Fig11D
Female present
Avg latency (sess of 20 trials)	1	2	3	4	5	6	7	8	9	10	11	12		1	2	3	4	5	6	7	8	9	10	11	12
sim 1	39	30.45	13.5	5.85	0.75	0.45	0.4	0.1	0.55	0.2	0.55	0.1		0.6	0.45	0.25	0.2	0.55	0.1	1.05	0.55	1.3	2.6	1.6	3.9
sim 2	29.7	7.3	1.35	0.85	0.7	0.4	0.15	0.15	0.15	0.4	0	0.3		0.7	0.15	0.5	0.9	0.6	0.55	2.85	2.7	2.95	2.9	8.2	4.2
sim 3	24.3	9.4	4.25	0.35	0.2	1	0.25	0.25	0.05	0	0.35	0.55		0.75	0.95	0.7	0.1	0.8	0.75	0.85	1.65	1.05	2.65	4.7	7.6
sim 4	38.1	20.9	3.2	0.9	1.05	0.6	0.75	0.3	0.75	0.6	0.35	0.25		0.2	0.2	0.95	0.6	0.15	1.15	0.35	2.25	1.35	1.3	2.6	1.8
sim 5	20.85	4.05	0.7	0.75	0.45	0.4	0.5	0.1	0.35	0.3	0.8	0.5		0.3	0.25	0.45	0.85	1.5	0.6	2.2	1	2.75	1.6	5.8	2.8
sim 6	37.15	33.2	11.55	2.95	1.25	0.85	0.3	0.3	0.45	0.3	0.55	0.05		0.85	0.6	0.3	1.4	0.7	1	1.95	0.6	1.4	5.8	2	3.1
sim 7	32.6	14.1	9.4	0.85	0.3	0.75	0.75	0.05	0.25	0.15	0.4	0.4		0.4	1.6	2	0.8	2.9	0.8	1.45	3.3	4.6	1.35	3.4	10.35
sim 8	36.85	30.35	6.35	2.1	0.65	1	0.15	0.15	0.3	0.15	0.05	0.3		0.2	0.3	0.65	0.45	0.3	0.15	0.5	0.6	1.35	0.65	2.5	2.4
sim 9	30.8	30.4	6.35	1.45	1.2	0.45	0.35	0.35	0.4	0.1	0.65	0.7		0.25	0.3	0.15	0.75	0.3	0.45	1.25	1.6	4.3	2.15	2.15	4.65
sim 10	24.75	38.5	5.65	4.05	0.6	0.85	0.15	0.25	0.7	0.15	0.2	0.2		0.35	0.35	0.1	0.2	0.4	0.35	1.65	0.9	0.55	3.35	1.7	5.15
n	10	10	10	10	10	10	10	10	10	10	10	10		10	10	10	10	10	10	10	10	10	10	10	10
mean	31.41	21.865	6.23	2.01	0.715	0.675	0.375	0.2	0.395	0.235	0.39	0.335		0.46	0.515	0.605	0.625	0.82	0.59	1.41	1.515	2.16	2.435	3.465	4.595
sd	6.46391	12.3372	4.20405	1.77573	0.35905	0.244097	0.228826	0.10274	0.225401	0.171675	0.256905	0.204192		0.243584	0.447245	0.557001	0.400174	0.822665	0.343835	0.77953	0.966394	1.4126	1.44838	2.14865	2.60741
serr	2.04407	3.90137	1.32944	0.561536	0.113541	0.0771902	0.072361	0.0324893	0.071278	0.0542883	0.0812404	0.0645712		0.0770281	0.141431	0.176139	0.126546	0.26015	0.10873	0.246509	0.305601	0.446704	0.458018	0.679463	0.824535
Female absent
Avg latency (sess of 20 trials)	1	2	3	4	5	6	7	8	9	10	11	12		1	2	3	4	5	6	7	8	9	10	11	12
sim 1	23.15	6.5	1.9	0.35	0.25	0.05	0	0.05	0.2	0.25	0.05	0.2		0.7	0.25	0.65	0.9	1.3	2.95	2.1	1.3	6.9	2.95	10.85	5.55
sim 2	19.1	2	0.65	0.5	0.1	0.15	0.35	0.1	0.15	0.1	0.1	0.3		0.25	1.65	0.45	1.15	3.2	5.8	1.15	5.7	3.95	4.9	10.3	7.65
sim 3	36.5	21.1	4.35	0.9	0.4	0.25	0.2	0	0.1	0.15	0.1	0.4		0.3	0.5	0.3	3.25	0.85	2.35	1.1	5.8	4	2.1	11.15	5.95
sim 4	35.55	4.55	7.15	0.75	0.3	0.2	0.35	0.05	0.15	0.1	0.05	0.1		0.05	0.35	0.2	1.7	0.95	1.4	2.35	1.25	1.1	6.95	2.6	7.85
sim 5	34.9	9.7	2.85	0.65	0.2	0.1	0.15	0.1	0.05	0.1	0.05	0.2		0.65	0.4	0.35	0.55	0.9	1.45	0.6	2.05	1.9	6.75	5	3.25
sim 6	29.75	6.6	1.9	0.15	0.2	0.35	0.35	0.05	0.05	0.3	0.15	0.2		0.35	0.3	1.1	0.15	3.4	1.25	1.2	1.9	7.95	2.9	14.6	7.35
sim 7	34.75	18	3.6	1.4	0.5	0.8	0.2	0.1	0.2	0.15	0.3	0.2		0.35	0.3	0.5	0.7	0.8	0.8	1.15	1.95	3.05	6.45	5.05	6.7
sim 8	34.6	27.2	13.65	1.7	0.45	0.15	0.1	0.1	0.3	0	0.35	0.05		0.2	0.2	0.2	0.55	0.95	1.1	3	1.95	1.25	5.15	6.3	8.5
sim 9	21.7	18.15	1.45	0.9	0.25	0.6	0.1	0.35	0.3	0.45	0.15	0.25		0.3	0.1	0.5	0.55	0.85	1.9	1.5	2.45	2.05	4.75	9.95	7.05
sim 10	31.05	22.25	1.25	1.35	0.15	0.2	0.15	0.05	0.05	0.35	0.1	0.2		0.05	0.3	0.3	1.15	1.05	1.2	0.55	3.5	3.15	4.2	4.65	4.45
n	10	10	10	10	10	10	10	10	10	10	10	10		10	10	10	10	10	10	10	10	10	10	10	10
mean	30.105	13.605	3.875	0.865	0.28	0.285	0.195	0.095	0.155	0.195	0.14	0.21		0.32	0.435	0.455	1.065	1.425	2.02	1.47	2.785	3.53	4.71	8.045	6.43
sd	6.46755	8.73802	3.9243	0.493316	0.131656	0.238106	0.121221	0.0955975	0.0955975	0.138343	0.104881	0.0966092		0.216282	0.44036	0.268173	0.880987	0.999236	1.4752	0.783936	1.68293	2.30014	1.69588	3.82466	1.63744
serr	2.04522	2.76321	1.24097	0.156	0.0416333	0.0752957	0.0383333	0.0302306	0.0302306	0.043748	0.0331662	0.0305505		0.0683943	0.139254	0.0848037	0.278593	0.315986	0.4665	0.247902	0.532189	0.72737	0.536284	1.20946	0.517805
Male present
Avg latency (sess of 20 trials)	1	2	3	4	5	6	7	8	9	10	11	12		1	2	3	4	5	6	7	8	9	10	11	12
sim 1	29.85	26.15	17.9	16	7.8	7.05	2.9	2	2.55	3.65	1.5	1.95		3.6	3.6	7.1	3.7	6.65	7.3	13.75	15.7	19	9	27	22.1
sim 2	28.55	27.6	26.65	16.9	5.65	10.15	2.1	2.85	2.1	3.35	3.25	2.65		1	1.15	7.1	10.8	5.5	5.35	16.9	19.25	13.6	11.8	15.5	19.75
sim 3	32.2	19.75	29.85	24.3	15.85	5.8	10.8	4.8	5.95	1.25	1.55	3		3.3	1.4	2.05	6.6	8.7	8.4	10	15.05	11.8	13.9	29.7	25.7
sim 4	34.7	24.65	20.75	9.55	9	3.1	3.75	2.2	3.95	1.1	1.65	1.5		2.55	2.8	4.6	4.45	7.95	4.1	8.15	28.65	22.4	27.45	20.5	19.6
sim 5	39	29.9	20.95	22.85	29.2	8.9	4.8	7	3.95	1.2	1.15	2.6		3.15	1.5	6.15	3.8	15	9.15	7.85	10.7	8.75	19.95	31	27.35
sim 6	28.1	28.8	24.55	9.05	11.55	6.8	3.5	3.35	2	1.1	2	1.35		0.9	2.1	10.55	1.7	22.7	4.4	23.55	23.55	17.75	26.85	16.05	27.25
sim 7	37	33	34.65	14.35	27.5	14.3	6.35	3.45	2.5	2.45	2.7	2.15		1.6	2.65	2.95	3.4	5.25	4.45	21.1	15.05	8.5	26.4	11.85	14.65
sim 8	36.65	29.35	32.35	26.75	14.3	14.35	10.15	2.55	4.85	2.35	2.15	1.95		1.6	6.45	3.4	1.45	5.95	8.5	16.4	11.4	20.95	11.25	17	22.25
sim 9	31.3	39	31.5	14.05	26.3	9.2	5	5.85	2.3	0.55	1.7	1.95		1.85	1.4	2.05	7.1	15.65	12.55	28	15.3	6.4	25.4	8.1	18.65
sim 10	39	36.7	33.3	27.65	22.45	14.55	15.9	11.5	3	3.05	2.45	5.95		1.2	3.25	2.2	6.85	4.1	10.95	2.45	12.3	7	9.15	25.55	22.3
n	10	10	10	10	10	10	10	10	10	10	10	10		10	10	10	10	10	10	10	10	10	10	10	10
mean	33.635	29.49	27.245	18.145	16.96	9.42	6.525	4.555	3.315	2.005	2.01	2.505		2.075	2.63	4.815	4.985	9.745	7.515	14.815	16.695	13.615	18.115	20.225	21.96
sd	4.18257	5.66107	5.95546	6.81768	8.76257	3.95553	4.39964	2.93678	1.32036	1.10037	0.638053	1.31391		1.00062	1.58889	2.84352	2.85803	6.04338	2.92632	7.93481	5.65766	6.01863	7.86519	7.79972	4.02891
serr	1.32265	1.79019	1.88328	2.15594	2.77097	1.25085	1.39129	0.928692	0.417536	0.347966	0.20177	0.415495		0.316425	0.50245	0.899199	0.90379	1.91109	0.925384	2.50921	1.78911	1.90326	2.48719	2.46649	1.27405
Male absent
Avg latency (sess of 20 trials)	1	2	3	4	5	6	7	8	9	10	11	12		1	2	3	4	5	6	7	8	9	10	11	12
sim 1	28.4	16.4	7.45	7.5	2.9	2.35	1.7	1.85	0.55	1.75	2.35	0.65		2.75	8	2	3.7	13.65	11.9	5.4	9.1	14.7	26.35	28.15	18.8
sim 2	27.35	19.1	13.85	11.7	2.55	2.1	2.05	1.35	2.1	0.95	2.45	1.45		0.7	3.35	6.05	1.05	8.15	3.3	12.45	4.6	8.55	21.7	9.55	22.95
sim 3	21.5	29.15	26.1	7.15	4.25	2.35	4.95	1	1	1.4	0.9	1.85		1.95	1.45	4.1	7.3	5.15	12.5	12.6	8.35	18.95	19.55	15.25	17.5
sim 4	34.4	32.85	24.9	16.35	9.15	3.3	2.25	2.3	0.9	1.2	1.75	1.05		6.75	3.45	6.95	7.65	14.5	3.9	13.55	27	21.7	25.5	30	27.6
sim 5	31.75	26.35	28.45	10.25	5.85	0.6	1.7	1.35	1.25	3.4	1.6	0.85		3.55	6.45	7.35	8	7.05	12.4	6	17.6	22.35	18.3	18.05	34.15
sim 6	33.9	28	12.7	3.9	3.35	2.4	1.85	2	1.8	0.95	1.45	1.05		0.75	5.95	3.35	2.25	2.8	12	8.2	12.6	14.95	11.85	17.75	21.9
sim 7	33.35	20.25	5.15	2.35	1.75	2.4	1.25	1.75	4.55	1.7	2.8	1.75		1.6	2.8	4.65	7.5	3.05	9.8	10.8	18	16.65	18	11.25	12.75
sim 8	31.9	20.55	9.75	5.3	2.65	1.35	2.5	1.8	0.6	1.65	0.1	0.85		1.55	1.3	4.25	3.95	3.45	5.15	4	19.2	17	33.15	16	13.45
sim 9	35.45	36.9	19.55	11.55	5.85	6.2	1.2	1.85	3.4	1.35	4.75	0.5		1.35	2.85	1.4	6.85	8.75	5.95	14.15	9.1	31.7	26.45	28.3	14.25
sim 10	29.55	30.35	17.3	39	8.35	2.75	1.85	1.95	1.8	1.6	0.85	3.1		5.55	2.35	4.6	15.45	12.8	14.1	19.9	19	22.45	13.5	22.55	27.6
n	10	10	10	10	10	10	10	10	10	10	10	10		10	10	10	10	10	10	10	10	10	10	10	10
mean	30.755	25.99	16.52	11.505	4.665	2.58	2.13	1.72	1.795	1.595	1.9	1.31		2.65	3.795	4.47	6.37	7.935	9.1	10.705	14.455	18.9	21.435	19.685	21.095
sd	4.19659	6.67694	8.11864	10.521	2.5506	1.47143	1.06854	0.380205	1.28958	0.697794	1.29508	0.77165		2.05332	2.24567	1.94239	4.04662	4.46001	4.08785	4.86104	6.81658	6.19341	6.52483	7.2573	7.08898
serr	1.32708	2.11143	2.56734	3.32703	0.806572	0.465308	0.337902	0.120231	0.407802	0.220662	0.409539	0.244017		0.649316	0.710143	0.614238	1.27965	1.41038	1.29269	1.5372	2.15559	1.95853	2.06333	2.29496	2.24173

## Sheet: Fig14C
Female present
Avg latency (sess of 20 trials)	1	2	3	4	5	6	7	8	9	10	11	12		1	2	3	4	5	6	7	8	9	10	11	12
sim 1	47.8	19.4	6.35	0.8	0.7	0.95	0.3	1.3	2	1.65	1.55	2.75		1.5	2.75	3.85	10.25	3.95	8.15	14.85	24.3	34.1	22.85	19.1	32.35
sim 2	44.55	37.2	15.75	1.95	0.9	1.45	1.05	0.85	1.15	0.9	0.9	1.75		4.55	5.75	5.5	6.65	23.05	11.2	18.55	24.1	25.3	25.1	37.5	37.85
sim 3	54	46.75	46.95	20.8	1.4	0.75	1.4	1.7	1.25	0.7	0.8	1.45		2.7	2.8	6.4	7.25	15.55	20.8	28.65	29.65	24.25	31.65	34.55	37.65
sim 4	49.25	33.15	21.95	2.9	0.8	0.6	0.45	0.8	0.65	1.5	1.05	1.2		1.9	2.25	7.5	10	9.65	28.8	7.85	26.15	35.85	15.7	37.35	34.2
sim 5	42.2	28.95	2.2	0.95	1.2	0.9	0.55	1.15	0.75	0.7	1.2	3.35		2.2	3.25	1.6	4.45	3.9	14.4	6.55	11.1	37	21.8	23.2	28.7
sim 6	28.05	10.9	1.95	1.5	1	0.7	1.7	0.7	0.5	0.9	0.5	1		1.55	2.8	1.85	13.1	8.35	21.4	11.85	24.2	29.95	33.6	28.8	30.05
sim 7	33.1	37.55	4.95	1.25	0.95	0.5	0.8	0.6	0.55	1.55	1.1	1.5		4.55	5.55	4	5.85	21.9	15.8	19.6	27.5	18.25	26.15	27.85	34.25
sim 8	48.7	48.95	42.95	42.7	11.2	1.2	0.75	0.95	0.85	0.25	0.7	1.35		0.85	1.3	2.25	3.85	6.3	6.35	25.25	8.25	30.45	18.95	22.2	39.3
sim 9	47.9	20.55	8.4	1.75	0.7	0.4	0.65	1.05	1	1.15	1.6	1.6		1.8	4.35	3	6.95	5.9	9.8	19.7	26.5	19.8	25.15	24.3	28.45
sim 10	39.6	15	2.85	0.55	0.3	1.2	0.6	0.9	0.95	1.55	1.7	1.1		1.9	3.2	3.25	8.4	6.25	18.15	17.3	23.25	22.4	18.7	31.7	24.2
n	10	10	10	10	10	10	10	10	10	10	10	10		10	10	10	10	10	10	10	10	10	10	10	10
mean	43.515	29.84	15.43	7.515	1.915	0.865	0.825	1	0.965	1.085	1.11	1.705		2.35	3.4	3.92	7.675	10.48	15.485	17.015	22.5	27.735	23.965	28.655	32.7
sd	7.97959	13.1265	16.8331	13.7926	3.27601	0.339157	0.437956	0.321455	0.439096	0.470254	0.404695	0.757353		1.25366	1.41362	1.97838	2.83061	7.16187	6.96687	7.02689	7.05313	6.6995	5.64181	6.49972	4.86136
serr	2.52337	4.15097	5.32308	4.36159	1.03597	0.107251	0.138494	0.101653	0.138854	0.148707	0.127976	0.239496		0.396443	0.447027	0.62562	0.895118	2.26478	2.20312	2.2221	2.2304	2.11857	1.7841	2.05539	1.5373
Female absent
Avg latency (sess of 20 trials)	1	2	3	4	5	6	7	8	9	10	11	12		1	2	3	4	5	6	7	8	9	10	11	12
sim 1	39.2	48.75	8.6	7.75	0.9	1.25	0.5	0.9	1	1.65	1.55	1.25		3.9	2.85	1.65	8.45	13.3	9.9	12.75	14.5	19.05	28.45	32.95	26.55
sim 2	35.9	21.95	5.85	2	0.9	0.65	0.5	0.75	1.05	1.4	0.65	2.25		1.65	2.6	4.45	5.6	9.55	2.95	17.45	15.65	21.25	25.25	29.55	22.1
sim 3	54	47.45	27.8	3.15	1.9	1.05	0.85	0.4	0.95	1.95	1.15	0.95		2.3	2.3	5.75	4.8	8.35	15.8	7.55	22.4	28.55	15.45	22.6	29.6
sim 4	50.45	46.9	44.15	11.5	6.45	0.35	0.8	0.45	0.65	1.55	0.9	1		0.7	1.75	1.95	2.45	6.8	5.35	9.85	9.75	19.8	20.75	23.9	28.75
sim 5	33.75	8.25	2.25	1.3	0.4	1.55	0.25	0.85	1.25	0.55	1.15	1.9		3.4	5.95	6.75	7.45	13.8	6.45	8.4	23.65	16.05	30.45	30	23.5
sim 6	49.45	44.45	29.6	1.85	3.85	1.5	0.55	1.5	1.7	0.85	1.25	1.2		1.55	1.55	3.95	3.6	3.2	9.65	13.15	6.1	34.05	30.25	17.85	31.75
sim 7	49.95	22.05	3.3	3.6	0.9	0.6	0.9	0.65	1.15	2.5	1.05	0.95		1.8	2	5.3	2.55	6.55	7.65	14.4	6.35	29.55	8	21.8	33.25
sim 8	48	46.85	44.35	6.7	1.65	1.25	0.65	0.9	1.75	1.1	1.1	1.3		0.9	3.05	3.05	12.45	6.55	9	10.2	30.25	24.75	33.35	35.45	28.55
sim 9	52.45	41.2	36.15	3.8	1.65	2.25	0.45	0.4	1	0.3	0.9	0.6		4.6	4.85	3.15	7.15	9.15	28.6	14.2	16	24.55	31.7	36.25	47.25
sim 10	50.3	42.55	30.7	3.9	1.6	1.05	1.6	0.6	0.75	1.15	1.5	1.25		0.75	2.6	2.9	1.65	3.6	2.8	9.35	8.75	5.15	16.55	11.75	28.4
n	10	10	10	10	10	10	10	10	10	10	10	10		10	10	10	10	10	10	10	10	10	10	10	10
mean	46.345	37.04	23.275	4.555	2.02	1.15	0.705	0.74	1.125	1.3	1.12	1.265		2.155	2.95	3.89	5.615	8.085	9.815	11.73	15.34	22.275	24.02	26.21	29.97
sd	7.24586	14.2314	16.7376	3.18621	1.82044	0.550252	0.373013	0.330656	0.360748	0.657013	0.273049	0.481923		1.37466	1.39841	1.6653	3.33892	3.552	7.61344	3.14653	8.05067	8.1093	8.45843	7.98557	6.94523
serr	2.29134	4.50036	5.29291	1.00757	0.575674	0.174005	0.117957	0.104563	0.114078	0.207766	0.0863456	0.152398		0.434706	0.442217	0.526614	1.05586	1.12324	2.40758	0.995021	2.54584	2.56438	2.67479	2.52526	2.19627
Male present
Avg latency (sess of 20 trials)	1	2	3	4	5	6	7	8	9	10	11	12		1	2	3	4	5	6	7	8	9	10	11	12
sim 1	50.55	52.55	38.35	43.9	35.65	11.3	9.35	3.55	2.7	3.7	3.05	2.25		3.65	10.6	16.65	23.2	33.25	25.95	30.5	28.55	39.15	29.85	36.15	37.65
sim 2	41.25	36.4	33.3	17.05	3.7	5.15	3	2.05	6.1	2.3	2.6	2.3		11.55	13.6	18.3	37.75	21.5	24.5	32.8	23.65	38.55	20.95	38.05	44.4
sim 3	50	43.75	46.4	36.3	25.25	7.15	3.4	5.65	2.2	3.2	1.9	2.65		7	11.9	18.8	20.45	20.5	30.1	30.65	29.45	28.85	26.85	33.75	42.15
sim 4	38.6	38	31.55	11.4	7.5	1.8	3.85	2.15	5.9	1.75	2.8	3.15		4.1	6.35	14.7	29.95	11.5	27.75	21.05	23.25	37.2	32.55	34.45	43.05
sim 5	51.3	49.85	42	11.45	15.65	7.1	4.9	2.35	3.6	3.3	1.6	3.2		5	11.25	5.1	21	23.3	35	33.5	33.9	28.65	34.55	32	44.65
sim 6	48.55	41.55	31.65	12.2	4.35	7.2	3.35	3.1	1.9	2.7	2.6	2.95		9.1	7.1	10.35	25.25	15.6	15.9	38.4	31	47.95	37.95	30.05	35.7
sim 7	43.6	34.4	41.8	36.15	25.2	10.05	12.9	3.1	2	3.75	1.7	2.65		10.15	28.65	23.25	22	22.85	36.65	32.95	29.45	35.15	33.65	29.5	45.2
sim 8	45.35	44.25	34.2	15.8	4.95	2.85	4.6	2.85	3.85	2.3	2.35	2.4		4.8	11.95	13.25	24.4	19.85	29.65	41.25	32.7	37.95	29.55	26.2	44.4
sim 9	54	44.35	35.75	37.7	28.95	4.9	6.45	3.4	2.95	2.8	5.6	2.5		2.75	7.2	10.55	13	32.6	20.05	24	33.1	17.05	36.2	40.75	25.5
sim 10	51.4	44.8	44	42.4	31.45	12.05	8.45	15.95	2.35	2.15	3	3.65		2.75	8.5	8.65	20.5	31.35	10.05	24.8	31.35	39.75	25.8	31.65	23.8
n	10	10	10	10	10	10	10	10	10	10	10	10		10	10	10	10	10	10	10	10	10	10	10	10
mean	47.46	42.99	37.9	26.435	18.265	6.955	6.025	4.415	3.355	2.795	2.72	2.77		6.085	11.71	13.96	23.75	23.23	25.56	30.99	29.64	35.025	30.79	33.255	38.65
sd	5.01823	5.67582	5.38042	13.8761	12.4406	3.42284	3.25928	4.18005	1.53504	0.679645	1.13632	0.455339		3.18434	6.43514	5.45903	6.54094	7.24155	8.29825	6.32393	3.68524	8.39309	5.22408	4.31428	8.02624
serr	1.5869	1.79485	1.70144	4.38802	3.93406	1.0824	1.03068	1.32185	0.485424	0.214922	0.359336	0.143991		1.00698	2.03497	1.7263	2.06843	2.28998	2.62414	1.9998	1.16538	2.65413	1.652	1.3643	2.53812
Male absent
Avg latency (sess of 20 trials)	1	2	3	4	5	6	7	8	9	10	11	12		1	2	3	4	5	6	7	8	9	10	11	12
sim 1	42.15	38.4	40.95	17.45	29.55	7.7	8.75	3.9	0.95	5.75	2.35	6.35		8.4	19.75	14.9	10.7	32.4	30.8	23.8	39.45	27.85	38	40.05	43.25
sim 2	38.3	26.4	11.95	5.3	5.5	3.4	2.4	2.65	4.4	3.75	2.5	2.15		7.2	9.25	4.25	24.75	19.4	23.1	42.35	27.15	40.2	25.55	40.95	26.35
sim 3	48.25	51.9	30.75	31	21.7	6.95	3.1	3.65	4.9	3.7	3.4	1.4		7.85	15.4	24.55	35.85	26.05	29.6	27.65	19.35	33	35.4	45.2	41.75
sim 4	49.3	34.25	35.85	28.75	16.3	5.05	3.45	3.15	3.7	2.65	2.6	2.95		12.15	11.4	27.7	27	20.9	22.6	32.15	35.85	21.65	44.4	22.1	32.6
sim 5	52.3	42	45.75	15.6	18.25	4.65	4.45	4.75	1.55	3.6	3.85	0.95		10.4	7.35	12.15	25.65	25.05	29.65	28.3	35.2	28.15	43.05	29.6	34.2
sim 6	43.1	37.85	23.85	8.25	13.75	2.5	6.35	1.3	2.05	3	3.35	3.4		6.5	6.4	12.85	10.9	22.75	34.65	34.1	39.15	40.65	33.25	31.1	38.6
sim 7	31.2	34.4	10.65	15	4.25	5.05	3.9	2	3.15	2.55	2.25	3.8		6.25	15.3	18.4	15.8	25.65	40.25	24.7	34.2	21.3	34.85	40.7	41.95
sim 8	46	41.75	52.95	39.2	24.4	12.7	7.6	4.4	3.25	3.25	1.75	3.45		11.4	5.8	29.35	30.95	29.65	22.4	24.8	34.3	32.35	25.95	36.5	43.15
sim 9	43.1	52.2	40.6	35.45	8.05	16.3	7.4	6.45	1.6	2.85	3.55	1.4		15.3	10.3	16.7	20.5	33.65	24.95	13.9	31.65	39.9	35.85	41.15	47.2
sim 10	46.35	18.45	23.8	10.1	9.95	4.6	4.15	5.95	3.2	2.2	2.95	2.55		3.35	6.2	30.75	21.75	37.25	38.95	41.5	23.05	30.45	33.15	34.95	49.65
n	10	10	10	10	10	10	10	10	10	10	10	10		10	10	10	10	10	10	10	10	10	10	10	10
mean	44.005	37.76	31.71	20.61	15.17	6.89	5.155	3.82	2.875	3.33	2.855	2.84		8.88	10.715	19.16	22.385	27.275	29.695	29.325	31.935	31.55	34.945	36.23	39.87
sd	6.01791	10.3725	14.0991	12.0379	8.42019	4.36462	2.19019	1.6388	1.29941	0.996438	0.671421	1.57123		3.46163	4.73609	8.66788	8.21909	5.81446	6.60313	8.5819	6.71272	7.14633	6.15293	6.93751	7.06184
serr	1.90303	3.28008	4.45852	3.80673	2.6627	1.38021	0.692598	0.518234	0.41091	0.315101	0.212322	0.496868		1.09466	1.49768	2.74102	2.5991	1.83869	2.08809	2.71384	2.12275	2.25987	1.94573	2.19383	2.23315

## Sheet: Fig14D
Female present
Avg latency (sess of 20 trials)	1	2	3	4	5	6	7	8	9	10	11	12		1	2	3	4	5	6	7	8	9	10	11	12
sim 1	50.05	35.05	7.6	1.25	1	1	0.95	1.55	0.5	0.95	1.6	2.5		1.1	0.7	1.6	2.9	1.75	2.4	5.05	5.7	14.55	12.95	20.35	22.95
sim 2	46.7	28.95	7.5	1.65	1.45	0.5	1	0.8	1.9	0.65	1.25	0.85		0.9	3.3	4.6	5.2	7.3	21.65	16.3	9.15	30.15	24.2	15.3	24.8
sim 3	48.25	17.85	9	1.05	0.5	1.3	0.75	1.95	1	0.75	0.75	2.1		1.35	2.4	3.85	4.8	3.05	9.25	20.7	18.05	24.5	19.75	28.1	17.1
sim 4	52.1	52	45.2	23.2	3.75	1.4	1.75	0.7	0.75	0.7	0.55	0.75		1.25	1.25	1.35	4.6	2.35	2.5	7.95	18.7	21.75	13.85	32.75	21.95
sim 5	46.25	50.2	28	13.65	1.45	1.05	1.15	0.55	0.65	1.25	0.85	1.75		3	3.65	2.85	3.35	8.9	9.2	17.8	17.35	23.5	21.95	35.05	20.95
sim 6	39.1	28.85	5.25	1.6	0.9	0.95	0.65	1.2	1.15	1.95	0.95	1.9		3.5	5.5	3.15	4.45	9.7	9.75	23	27	34	29.85	25.35	29.95
sim 7	49.25	25.3	6.15	0.85	1.2	1.1	0.6	0.85	1.9	2.2	1	1.2		2.85	7.05	3.15	2.8	4.95	5.85	19.3	31.4	17.7	17.45	25.35	41.4
sim 8	47.4	43.55	23.9	2.05	2.05	0.7	1.25	0.15	0.5	0.7	1.1	1.1		1.4	4.3	4.45	4.95	3.3	7.25	14.95	6.45	26.6	36.2	18.75	25.55
sim 9	45.3	8.3	3.1	3.9	1.35	0.8	0.85	1.1	0.85	1.5	0.8	1.85		0.9	2.15	3.05	4.75	7.65	12.2	9.55	19.8	16.65	16.15	33.45	33.5
sim 10	50.45	41.75	33	5.85	1.25	1.25	0.7	1.2	0.9	1.35	0.6	1.15		2.2	3.05	3.6	4.1	9.85	21.15	15.4	29.15	27.6	40	26	38.35
n	10	10	10	10	10	10	10	10	10	10	10	10		10	10	10	10	10	10	10	10	10	10	10	10
mean	47.485	33.18	16.87	5.505	1.49	1.005	0.965	1.005	1.01	1.2	0.945	1.515		1.845	3.335	3.165	4.19	5.88	10.12	15	18.275	23.7	23.235	26.045	27.65
sd	3.61479	14.0677	14.5728	7.33195	0.891565	0.280327	0.348847	0.513404	0.511968	0.552268	0.314863	0.583119		0.963054	1.91979	1.0659	0.871079	3.15649	6.70656	5.80306	9.13659	6.19337	9.34027	6.55894	7.93284
serr	1.1431	4.44861	4.60831	2.31857	0.281938	0.0886472	0.110315	0.162352	0.161898	0.174642	0.0995685	0.184398		0.304544	0.60709	0.337067	0.275459	0.998171	2.1208	1.83509	2.88924	1.95851	2.95365	2.07412	2.50859
Female absent
Avg latency (sess of 20 trials)	1	2	3	4	5	6	7	8	9	10	11	12		1	2	3	4	5	6	7	8	9	10	11	12
sim 1	48.85	45.8	31.5	11.85	2.8	0.95	1.15	1.15	1.3	0.8	1	0.8		3.1	1.75	3.15	8.85	9.75	10.85	29.7	27.5	28.8	27	30.6	35.3
sim 2	43.3	34.55	12.9	1.4	2.3	1	0.8	1.05	1.05	0.85	2.05	1.2		2.55	3.45	2.15	7.5	8.75	12.3	13.15	22.45	18.85	11.4	31.35	41.4
sim 3	28.15	3.5	2.95	0.95	1.2	0.75	1.1	0.85	1	1.95	0.95	2.55		0.7	1.7	3.3	3.4	2.35	4.4	3.45	15.05	9.75	19.15	21.05	37.4
sim 4	41.35	40.05	39.25	11	2.35	0.95	0.75	1.4	0.9	0.5	1.35	1.1		1.65	6.4	0.5	4.95	6.25	2.7	10.05	10	10.15	32.75	28.9	22.45
sim 5	51.35	13.25	7.15	0.8	0.85	1.15	0.9	1.2	1.3	1.3	1	1.9		1.15	1.1	6.45	6.6	9.8	4.8	19.65	19.2	33.45	18	30.6	28.3
sim 6	38.35	30.4	15.25	3.45	0.75	1	0.75	0.8	1.3	0.8	1.4	1.2		3.5	2.9	2.9	5.05	7.4	7.3	31.8	9.45	26.45	30.75	33.95	29.5
sim 7	49.85	32.75	10.5	1.3	1.2	0.6	1.2	1.1	1.35	0.9	1.2	1.05		1.55	1.95	5.75	4.55	7.5	11.6	11.9	22.05	23.3	24.65	32.25	49.5
sim 8	49.7	47.1	25.9	4.25	1.05	1.2	1.05	1.05	0.8	1.35	1.1	1.95		2.2	2.6	4.15	4.35	10.05	22.25	19.65	15.7	15.95	23.15	33.45	29.25
sim 9	38.7	18	2.35	0.5	0.6	0.85	0.6	0.65	1.25	2.15	3.2	1.25		2	1.6	3.1	3.4	7.55	7.7	7.7	10.2	24.2	22.3	31.6	21.85
sim 10	37	27.25	3.2	0.9	1.4	0.3	0.45	1.1	0.5	2.4	1.55	1.45		5.95	7.4	6.6	12.5	7	10.4	27.55	14.95	19.1	33.65	33.05	23.85
n	10	10	10	10	10	10	10	10	10	10	10	10		10	10	10	10	10	10	10	10	10	10	10	10
mean	42.66	29.265	15.095	3.64	1.45	0.875	0.875	1.035	1.075	1.3	1.48	1.445		2.435	3.085	3.805	6.115	7.64	9.43	17.46	16.655	21	24.28	30.68	31.88
sd	7.40907	14.1439	12.9522	4.28361	0.761212	0.267966	0.248607	0.216089	0.279136	0.654896	0.689283	0.530435		1.50001	2.13815	1.95426	2.8519	2.27472	5.5759	9.79109	6.06486	7.73947	7.03784	3.70677	8.96082
serr	2.34295	4.4727	4.09585	1.3546	0.240717	0.0847382	0.0786165	0.0683333	0.0882704	0.207096	0.21797	0.167738		0.474345	0.676143	0.617992	0.901851	0.719328	1.76325	3.09621	1.91788	2.44744	2.22556	1.17218	2.83366
Male present
Avg latency (sess of 20 trials)	1	2	3	4	5	6	7	8	9	10	11	12		1	2	3	4	5	6	7	8	9	10	11	12
sim 1	48.45	38.55	32.9	31.75	21.5	4.65	3.95	4.7	2.25	3	3.15	3.4		3	8.85	11.2	12.05	34.75	18.85	22.05	38.95	45.55	20.9	33.25	43.15
sim 2	36.3	31.1	28.05	9.95	7.05	3.1	7.95	2.4	3.3	2.55	2.45	2.2		13.1	26.4	25.85	20.3	19.2	34.95	29.45	29.65	43.75	38.2	41.25	26.35
sim 3	36.35	32.5	22.1	25.55	6.9	2.6	4.75	9.15	3.75	3.7	1.95	3.2		8.2	9.75	26.3	11.9	17.9	19.95	33.9	24.2	39.45	37.75	29.8	37.25
sim 4	52.9	39.35	44.45	48.5	24.6	29.65	10.7	6.25	5.35	3.2	4.95	1.95		3.4	21.75	23.9	13.4	14.6	21.65	37	33.2	32.5	34.7	31.1	34.05
sim 5	48	43.5	49.5	49.2	33.1	15.25	6.6	5.7	2.1	4.35	3.4	5.95		6.7	7.85	7.35	16.6	25.55	28.55	35.1	23.8	31.75	41.2	36.05	37.55
sim 6	48.85	49.45	46.15	39.65	39.55	14.1	17.75	15.55	6.55	3.25	3.8	3.15		8.2	10.5	31.5	12.5	28.6	35.1	30.8	31.55	39.95	43.95	43.3	29.95
sim 7	46.1	52.5	54	31.55	34.9	16.7	11.35	6.65	3.55	1.5	5.95	3.45		6.15	8.85	15.9	11.6	40.8	22.7	25.75	34.7	36.1	32.6	24.75	41.4
sim 8	48.25	45.8	40	26.15	9.25	4.2	5.4	4.75	4.6	2.3	2.5	3.15		4	5.85	8.75	20.85	21.95	34.15	45.65	31.9	37.25	14.6	37.35	50.3
sim 9	39.4	40	32.2	24.55	12	7.35	3.3	3.5	2.85	2.4	2.05	3.3		11.7	13.35	7.95	18.5	25.9	40.4	34.8	44.3	40.55	43.6	26.45	38.1
sim 10	54	50.85	18.35	22.4	15.75	13.45	3.5	8.85	4.6	2.8	3.4	2.35		7.1	10.1	10.95	22.25	25.35	19.5	24.35	34.5	35.9	30.9	39.3	35.2
n	10	10	10	10	10	10	10	10	10	10	10	10		10	10	10	10	10	10	10	10	10	10	10	10
mean	45.86	42.36	36.77	30.925	20.46	11.105	7.525	6.75	3.89	2.905	3.36	3.21		7.155	12.325	16.965	15.995	25.46	27.58	31.885	32.675	38.275	33.84	34.26	37.33
sd	6.37167	7.38959	11.9384	12.1336	12.1749	8.47698	4.58677	3.75144	1.40135	0.793533	1.28015	1.10373		3.34535	6.57437	9.05048	4.19613	7.87608	8.01402	6.96643	6.1809	4.4673	9.62912	6.24561	6.74641
serr	2.0149	2.33679	3.77526	3.83697	3.85004	2.68066	1.45046	1.18631	0.443145	0.250937	0.404818	0.34903		1.05789	2.079	2.86201	1.32693	2.49064	2.53426	2.20298	1.95457	1.41269	3.04499	1.97504	2.1334
Male absent
Avg latency (sess of 20 trials)	1	2	3	4	5	6	7	8	9	10	11	12		1	2	3	4	5	6	7	8	9	10	11	12
sim 1	46.25	50.4	48.45	44.55	40.95	39.75	29.8	18.05	6.75	7.2	3.95	2.1		6.65	5.95	20.5	33.95	15.95	48.3	22.9	27.85	39.45	33.95	48.05	38.4
sim 2	44.7	34.45	41.8	41.4	10.55	8.4	3.9	4.8	6.1	2.9	2.25	4.45		3.9	9.1	7.6	21.65	25.25	28.25	33.75	37.3	42.9	32.5	35.25	36.45
sim 3	51.9	43.05	34.15	29.75	18.55	7.8	7.9	5.75	2.45	3.1	2.25	2.35		10.85	15.95	21.95	38.05	31.2	18.1	25.4	38.8	30	41.1	38.55	32.95
sim 4	44.95	42.55	39.55	33.95	20.15	13.6	4.2	6.2	3.85	2.75	2.5	3.65		4.35	3.35	6.15	21.35	17.95	33.4	19.15	41.15	29.9	38.1	45.05	26.2
sim 5	51.4	32.45	48.3	27.55	15.65	4.95	3.15	8.5	2.3	2.95	3.8	1.95		6.85	3.6	20.95	36.55	29.65	24.3	32.95	28.5	43.15	45.2	37.85	39.45
sim 6	49.1	27.65	26.9	23.45	13.5	8.3	5.1	3	2.35	7.4	2.4	2.4		7.25	9.15	10.8	24.3	21.3	12.3	23.3	32.85	44.95	30.55	43.6	35.95
sim 7	47.9	45.8	39.35	28.5	25.75	15.35	5.8	2.75	8.55	4.65	1.7	5.3		3.25	9.85	8.45	10.15	25.5	42.5	47.5	15.8	38.35	44.7	25.25	48.8
sim 8	52.1	40.25	40.95	23.7	28.65	15.75	10.85	4.2	2.95	1.6	2.65	5.15		4.25	7.5	15.85	19.25	35.15	31.7	33.7	19.2	29.15	31.9	28.8	41.4
sim 9	45.25	40.5	33.65	16.05	12.5	8.15	5.5	2.9	3.4	3.2	2.2	2.5		4.8	17.55	22.35	23.55	27.8	27.6	36.35	33.75	30.35	42.85	30.8	28.95
sim 10	52.9	38.35	32.05	20.5	13.2	11.8	3.2	3.9	2.4	3.2	2.3	4.7		5.6	5.45	16.15	13	18.1	22.95	33.5	24.3	31.95	27.4	31.9	30.75
n	10	10	10	10	10	10	10	10	10	10	10	10		10	10	10	10	10	10	10	10	10	10	10	10
mean	48.645	39.545	38.515	28.94	19.945	13.385	7.94	6.005	4.11	3.895	2.6	3.455		5.775	8.745	15.075	24.18	24.785	28.94	30.85	29.95	36.015	36.825	36.51	35.93
sd	3.25691	6.65747	6.93113	8.95538	9.43897	9.93076	8.03222	4.59247	2.22646	1.93899	0.716473	1.34173		2.23809	4.7929	6.35602	9.43873	6.3568	10.7511	8.31488	8.39878	6.36584	6.39263	7.48334	6.61166
serr	1.02993	2.10528	2.19182	2.83194	2.98486	3.14038	2.54001	1.45227	0.704068	0.613163	0.226569	0.424294		0.707745	1.51565	2.00995	2.98479	2.0102	3.39979	2.6294	2.65593	2.01306	2.02153	2.36644	2.09079
